# Supplementary material for: A 13CO2 Enrichment Experiment to Study the Synthesis Pathways of Polyunsaturated Fatty Acids of the Haptophyte Tisochrysis lutea
Source: MDPI journal article supplement (doi:10.3390/md20010022), 2021-12-24
Supplement: s1 [file s1]

## SUPPLEMENTARY FILES

**Table S1:** Cellular parameters of *Tisochrysis lutea* (morphology (FSC and SSC), viability (FL1 - SYTOX), and chlorophyll content (FL3) using flow cytometry analysis (Mean  $\pm$  SD of the 3 balloons). Values for SYTOX are in %, values for FL3/SSC/FSC in arbitrary unit (a.u).

|            | FL1 – SYTOX<br>ALIVE |       |   |     | FL3   |    |    | SSC   |    | FSC |       |   |
|------------|----------------------|-------|---|-----|-------|----|----|-------|----|-----|-------|---|
| <b>0</b>   | 98                   | $\pm$ | 1 | 134 | $\pm$ | 9  | 52 | $\pm$ | 7  | 165 | $\pm$ | 4 |
| <b>0.5</b> | 95                   | $\pm$ | 2 | 139 | $\pm$ | 10 | 49 | $\pm$ | 6  | 165 | $\pm$ | 6 |
| <b>1</b>   | 95                   | $\pm$ | 1 | 140 | $\pm$ | 9  | 44 | $\pm$ | 2  | 167 | $\pm$ | 5 |
| <b>2</b>   | 94                   | $\pm$ | 0 | 134 | $\pm$ | 11 | 49 | $\pm$ | 10 | 168 | $\pm$ | 4 |
| <b>3</b>   | 95                   | $\pm$ | 3 | 134 | $\pm$ | 11 | 49 | $\pm$ | 11 | 169 | $\pm$ | 4 |
| <b>4</b>   | 95                   | $\pm$ | 2 | 134 | $\pm$ | 11 | 44 | $\pm$ | 8  | 170 | $\pm$ | 5 |
| <b>6</b>   | 95                   | $\pm$ | 2 | 134 | $\pm$ | 11 | 47 | $\pm$ | 10 | 170 | $\pm$ | 2 |
| <b>8</b>   | 94                   | $\pm$ | 2 | 134 | $\pm$ | 11 | 52 | $\pm$ | 4  | 169 | $\pm$ | 2 |
| <b>10</b>  | 93                   | $\pm$ | 2 | 135 | $\pm$ | 10 | 46 | $\pm$ | 5  | 171 | $\pm$ | 3 |
| <b>12</b>  | 96                   | $\pm$ | 1 | 136 | $\pm$ | 9  | 44 | $\pm$ | 4  | 171 | $\pm$ | 2 |
| <b>14</b>  | 97                   | $\pm$ | 1 | 137 | $\pm$ | 11 | 44 | $\pm$ | 6  | 171 | $\pm$ | 2 |
| <b>16</b>  | 97                   | $\pm$ | 1 | 137 | $\pm$ | 12 | 44 | $\pm$ | 3  | 171 | $\pm$ | 3 |
| <b>18</b>  | 97                   | $\pm$ | 1 | 136 | $\pm$ | 13 | 44 | $\pm$ | 3  | 173 | $\pm$ | 4 |
| <b>20</b>  | 96                   | $\pm$ | 2 | 136 | $\pm$ | 13 | 46 | $\pm$ | 4  | 173 | $\pm$ | 3 |
| <b>22</b>  | 97                   | $\pm$ | 1 | 136 | $\pm$ | 13 | 42 | $\pm$ | 6  | 174 | $\pm$ | 3 |
| <b>24</b>  | 97                   | $\pm$ | 1 | 137 | $\pm$ | 12 | 42 | $\pm$ | 5  | 175 | $\pm$ | 2 |

**Table S5:** Mean ratio of atomic enrichment (AE) for pairs of FA (FA<sub>A</sub> vs FA<sub>B</sub>) in the neutral lipids (NL) (mean  $\pm$  SD, n=9 sampling dates t<sub>8</sub> to t<sub>24</sub>) for the two enriched balloons (T11, T12, T1 = *Tisochrysis lutea*). If the ratio is equal to or close to 1, A and B are assumed at equilibrium, and B is synthesized quickly from A; if the ratio is below 1, the transformation of B from A is possible but slow. Finally, if the ratio is above 1, A is not a main precursor of B, which has to be synthesized by a different pathway.

| Fatty acid B/Fatty acid A | Neutral lipids |      |      |      |
|---------------------------|----------------|------|------|------|
|                           | T11            |      | T12  |      |
|                           | Mean           | SD   | Mean | SD   |
| 18:5n-3/18:4n-3           | -              | -    | -    | -    |
| 20:5n-3/18:5n-3           | 3.58           | 1.78 | 3.33 | 1.40 |
| 22:5n-3/20:5n-3           | 0.92           | 0.14 | 0.64 | 0.12 |
| 22:6n-3/22:5n-3           | 0.55           | 0.17 | 0.79 | 0.14 |
| 22:6n-3/20:5n-3           | 0.49           | 0.11 | 0.50 | 0.11 |
| 22:6n-3/22:5n-6           | 0.49           | 0.15 | 0.65 | 0.15 |

**Table S6:** List of the potential candidate protein sequences involved in *Tisochrysis lutea* PKS synthesis pathway. The suspected function of each protein has been assumed using the NCBI Conserved Domain Database (CDD) (Marchler-Bauer et al., 2017) by identifying the role of each domain recognized in the sequence. In columns KS/KR/DH/ER are written the number of domain corresponding to these functions in the studied sequences. **ACS:** Acetyl-CoA synthetase, **A\_NRPS:** Adenylation domain of the non-ribosomal peptide synthetase (**NRPS**), **Croto:** crotonase/enoyl-CoA hydratase, **EntF:** Enterobactin non-ribosomal peptide synthetase or thioesterase domain of Type I PKS, **FAAL:** Fatty Acyl-AMP ligase, **GrsT:** alpha/beta hydrolase, **HM:** hydroxymethylglutaryl-CoA synthase, **MT:** methyltransferase, **PP:** PhosphoPantetheine-binding (= “swinging arm”), **Sulf:** sulfotransferase, **Thio:** thioesterase

| NAME       | 4 DOMAINS | Cluster   | KS | KR | DH | ER | OTHER DOMAINS          | SUSPECTED FUNCTION                           |
|------------|-----------|-----------|----|----|----|----|------------------------|----------------------------------------------|
| TISO_16054 | No        |           | 0  | 0  | 1  | 0  | No                     | 3-hydroxyacyl-ACP dehydratase                |
| TISO_09404 | No        |           | 1  | 0  | 0  | 0  | No                     | $\beta$ -ketoacyl-ACP synthase II            |
| TISO_19207 | No        |           | 1  | 0  | 0  | 0  | No                     | 3-ketoacyl-CoA synthase                      |
| TISO_09037 | No        |           | 0  | 1  | 0  | 0  | No                     | $\beta$ -ketoacyl-ACP reductase II           |
| TISO_04539 | Yes       |           | 7  | 1  | 1  | 1  | PP+FAAL                | Supposed involved in complex lipid synthesis |
| TISO_06404 | Yes       |           | 4  | 3  | 2  | 1  | PP+Thio                | Thioesterase                                 |
| TISO_06537 | Yes       |           | 4  | 5  | 4  | 3  | PP+Sulf+EntF           | Thioesterase / Sulfotransferase              |
| TISO_08010 | No        |           | 1  | 0  | 0  | 0  | No                     | $\beta$ -ketoacyl-ACP synthase II            |
| TISO_08047 | Yes       |           | 17 | 18 | 16 | 14 | PP+MT+Thio             | Thioesterase / Methyltransferase             |
| TISO_11097 | Yes       |           | 6  | 5  | 4  | 4  | PP+EntF                | Peptide synthesis                            |
| TISO_14040 | No        |           | 1  | 0  | 0  | 0  | No                     | $\beta$ -ketoacyl-ACP synthase II            |
| TISO_14962 | Yes       | Cluster 1 | 7  | 8  | 5  | 4  | PP+MT+Thio             | Methyltransferase / Thioesterase             |
| TISO_14968 | Yes       | Cluster 1 | 2  | 3  | 2  | 3  | PP                     | FA synthesis                                 |
| TISO_14973 | No        | Cluster 1 | 1  | 0  | 1  | 0  | PP                     | Ketoacyl-synthase for n-3 PUFA               |
| TISO_14975 | Yes       | Cluster 1 | 1  | 2  | 1  | 2  | PP                     | FA synthesis                                 |
| TISO_14977 | Yes       | Cluster 1 | 4  | 2  | 2  | 3  | PP + ACS               | Acetyl-CoA synthetase / FA synthesis         |
| TISO_15188 | No        |           | 1  | 1  | 0  | 0  | PP+GrsT+A_NRPS         | Peptide synthesis                            |
| TISO_16495 | Yes       |           | 6  | 9  | 5  | 4  | PP+FAAL+Sulf+EntF+Thio | Thioesterase / Sulfotransferase              |
| TISO_27353 | Yes       | Cluster 2 | 2  | 1  | 1  | 1  | PP+EntF                | Thioesterase / Peptide synthesis             |
| TISO_27354 | No        | Cluster 2 | 2  | 0  | 0  | 0  | PP+FAAL                | Supposed involved in complex lipid synthesis |
| TISO_30977 | No        |           | 5  | 2  | 2  | 0  | PP+MT+Croto+HM         | Complex lipid synthesis                      |
| TISO_37254 | No        | Cluster 3 | 1  | 2  | 0  | 1  | PP+Sulf+EntF           | Thioesterase / Sulfotransferase              |
| TISO_37256 | No        | Cluster 3 | 1  | 0  | 0  | 0  | No                     | Claisen condensation                         |
| TISO_37258 | No        | Cluster 3 | 1  | 0  | 1  | 0  | No                     | Claisen condensation / Dehydratase           |
| TISO_37259 | No        | Cluster 3 | 0  | 0  | 0  | 0  | PP                     | Phosphopantetheine binding                   |
| TISO_37260 | Yes       | Cluster 3 | 7  | 6  | 5  | 3  | PP+FAAL                | Supposed involved in complex lipid synthesis |
| TISO_37578 | No        | Cluster 4 | 1  | 0  | 0  | 0  | No                     | Claisen condensation                         |
| TISO_37579 | Yes       | Cluster 4 | 3  | 2  | 2  | 1  | PP                     | FA synthesis                                 |
| TISO_37581 | No        | Cluster 4 | 1  | 0  | 0  | 0  | PP                     | Claisen condensation / PP-binding            |
| TISO_37631 | Yes       |           | 4  | 3  | 4  | 3  | PP                     | FA synthesis                                 |

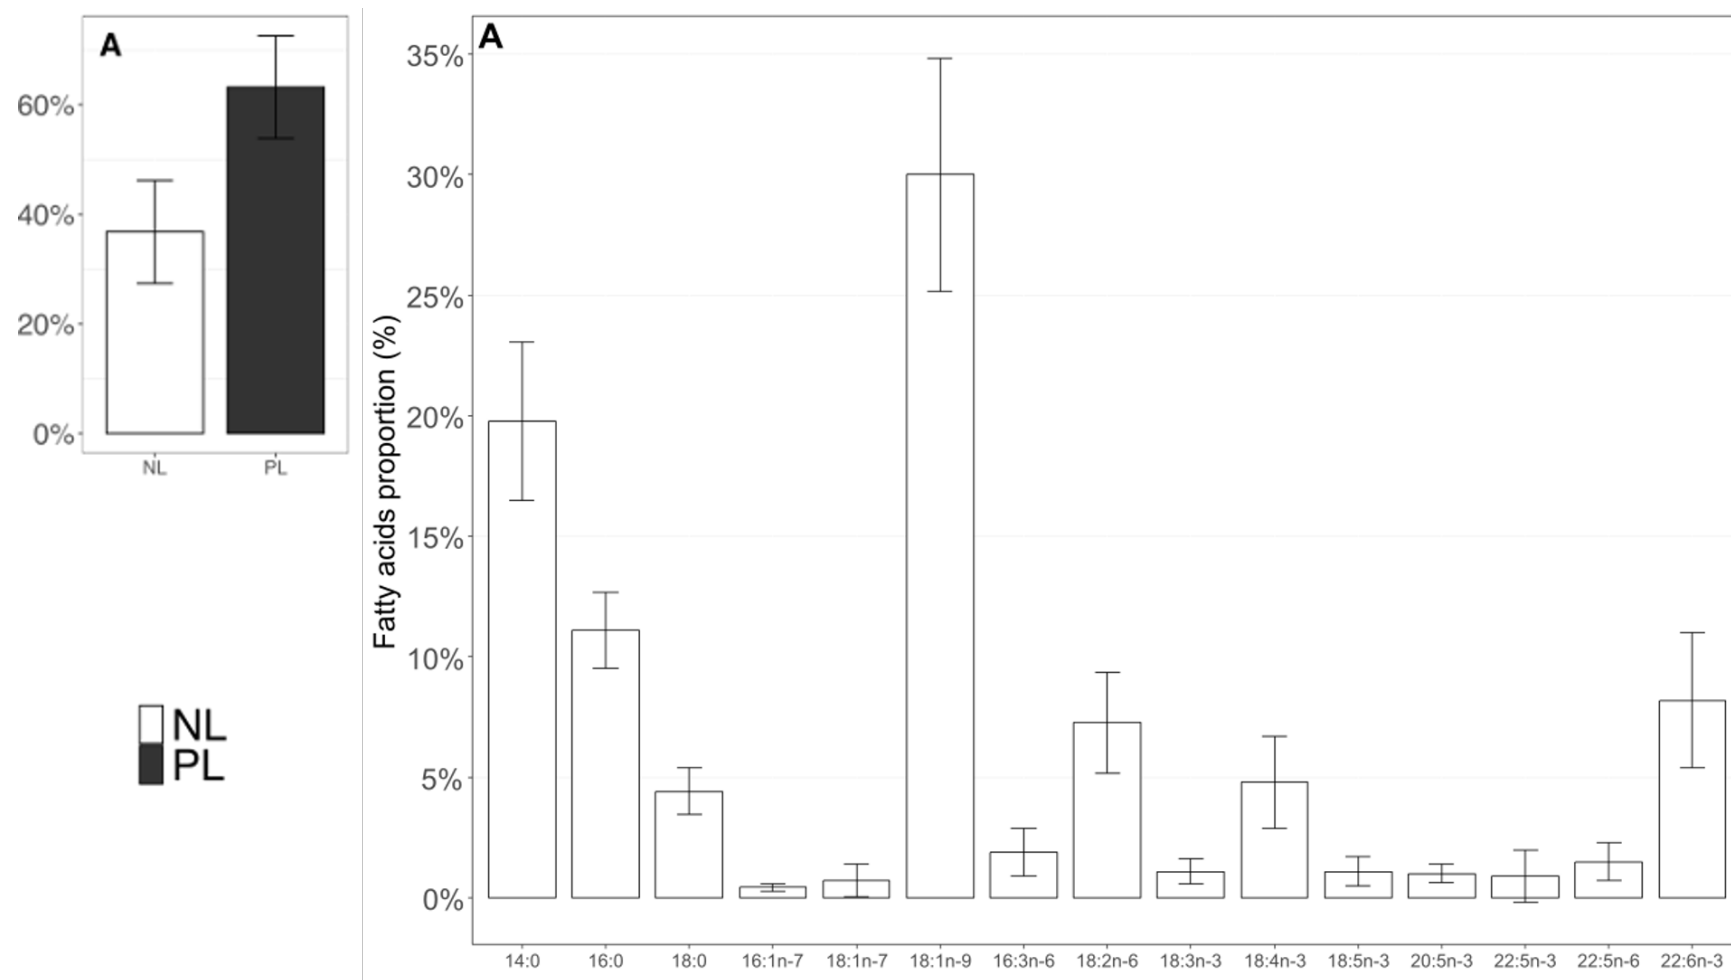

**Figure S1:** Proportions (%) of NL vs PL [A] and proportions (%) in average over the 24 hours of fifteen fatty acids in the NL fraction [B]

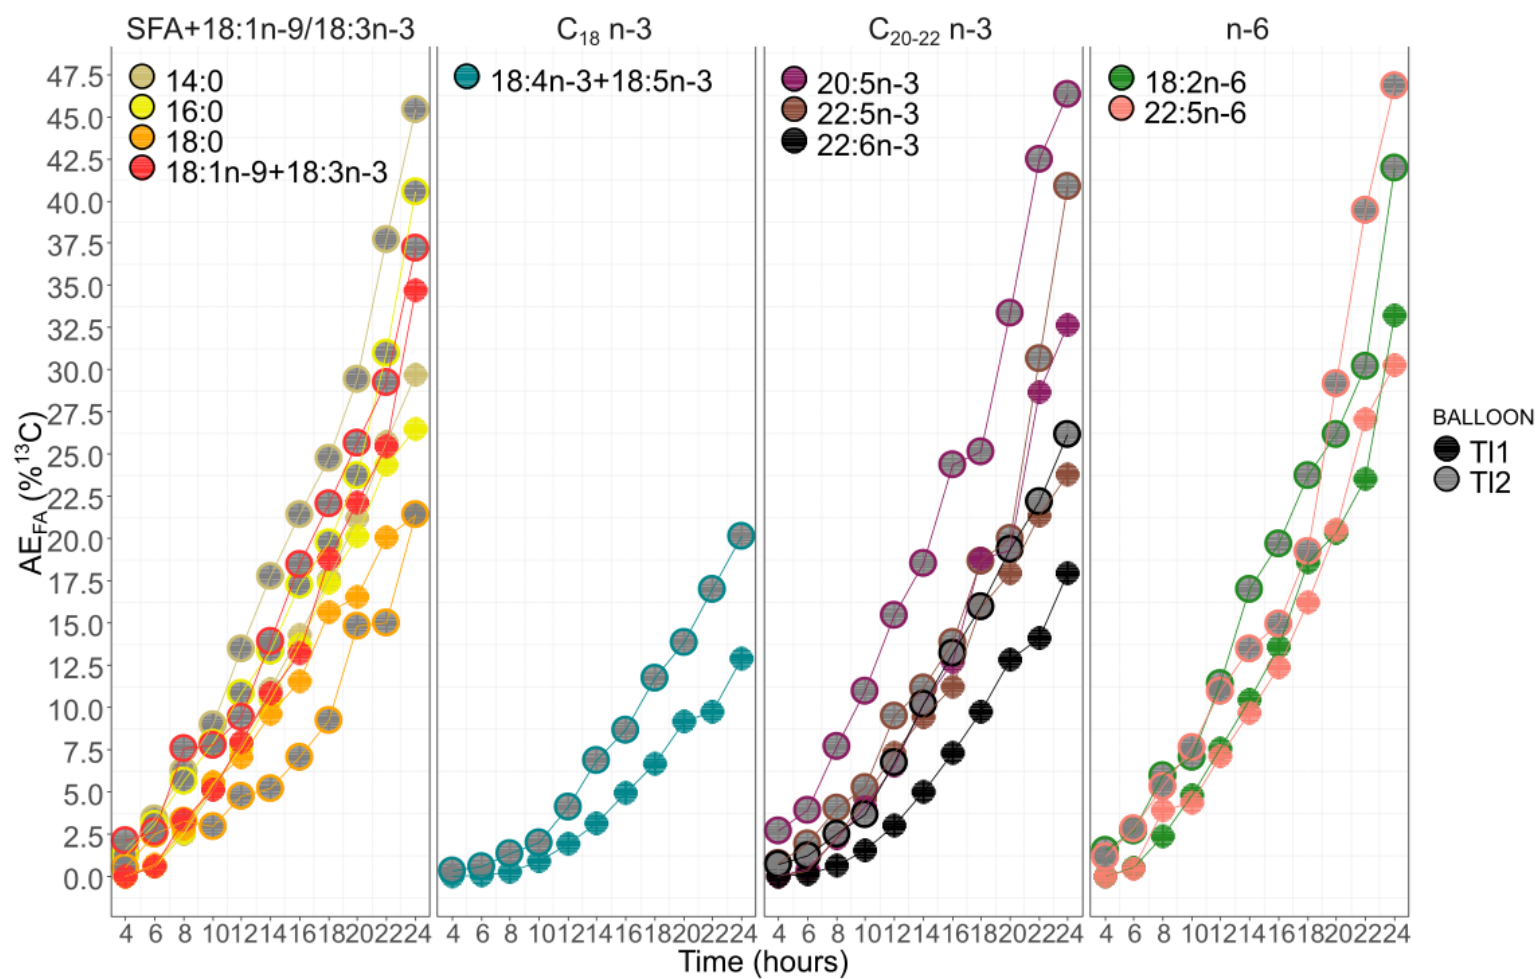

**Figure S2:** Atomic enrichment of 11 main fatty acids in the polar lipid (NL) fraction during a 24h <sup>13</sup>C labelling experiment. T1: *Tisochrysis lutea*.
