# Supplementary material for: A 13CO2 Enrichment Experiment to Study the Synthesis Pathways of Polyunsaturated Fatty Acids of the Haptophyte Tisochrysis lutea
Source: Mar Drugs. 2021 Dec 24;20(1):22. doi: 10.3390/md20010022 (PMC8779623; doi:10.3390/md20010022)
Supplement: Supplementary file 1 [file marinedrugs-20-00022-s001.zip › SUPPLEMENTARY REMIZE et al- TablesS2S3S4.xlsx]

## Sheet: Table S2 (microgC.L-1)
ID	Type	Time	TMTD	iso15:0	ante15:0	iso16:0	iso17:0	14:0	15:0	16:0	17:0	18:0	20:0	21:0	22:0	24:0	14:1n-5	15:1n-5	16:1n-9	16:1n-7	18:1n-9	18:1n-7	20:1n-9	22:1n-9	24:1n-9	16:2n-7	16:2n-6	16:2n-4	16:3n-6	16:3n-3	16:4n-3	16:4n-1	18:2n-6	18:3n-6	18:3n-3	18:4n-3	18:5n-3	20:2n-6	20:3n-6	20:3n-3	20:4n-6	20:4n-3	20:5n-3	22:2n-6	22:4n-6	22:5n-6	22:5n-3	22:6n-3
Tl1t0	PL	0	2.78302	13.7576	1.57529	17.4858	1.73282	1021.74	28.5653	523.628	2.46796	39.96	1.26024	3.09808	3.88573	16.8557	12.5498	4.09577	11.0271	52.6673	636.577	59.9662	1.0502	0.577608	18.1159	5.09345	1.99537	2.36294	2.52047	2.20541	0.735137	0.472588	166.719	11.7622	171.235	476.474	145.347	10.6595	1.41777	3.41314	1.52278	0.682628	23.997	3.67569	7.29886	150.231	23.1568	660.521
Tl1t1/2	PL	0.5	3.10724	0.909435	1.21258	2.1978	0.60629	805.002	6.44183	432.664	1.13679	36.6048	2.65252	2.42516	3.18302	36.1501	10.989	4.92611	6.44183	37.5142	534.748	52.2167	0.682077	2.95567	12.8079	0.227359	3.8651	9.01857	0	0.151573	0.0757863	0.151573	133.914	8.2607	133.839	370.519	114.437	6.74498	2.65252	4.69875	4.77454	0.151573	19.5529	8.03335	5.38083	120.728	22.2812	530.883
Tl1t1	PL	1	2.67867	7.54897	2.48385	4.52938	0.633139	760.546	13.9778	396.686	1.21758	29.7088	1.5585	1.85071	3.99365	26.4944	10.2276	3.94494	7.06194	37.2091	442.37	44.2223	1.12017	0.243515	16.8512	4.7729	1.21758	1.16887	0.681842	0.584436	0.194812	1.31498	114.501	9.01006	130.621	365.76	110.945	9.83801	1.02276	2.92218	3.99365	0.389624	18.8481	3.50662	6.33139	113.722	18.4584	507.778
Tl1t2	PL	2	2.84193	28.9268	2.99417	28.7238	3.40016	918.349	34.9659	465.823	1.82695	40.3452	0.202995	2.63893	4.00915	26.7446	11.114	8.0183	10.4035	50.9517	570.872	57.7013	0.659733	1.11647	13.2962	5.37937	7.20632	9.69301	2.0807	0.710482	0.0507487	0.558236	144.786	11.3677	171.378	472.826	131.541	18.4725	2.38519	4.56739	4.71963	0.101497	25.6789	2.68968	8.67803	113.779	23.0907	640.297
Tl1t3	PL	3	4.01683	14.0589	2.73875	9.67691	2.55616	892.284	22.3664	469.786	1.27808	37.0644	2.64746	4.01683	5.47749	10.6811	11.594	6.93816	7.94237	48.2932	570.116	58.6092	0.182583	0.273875	1.91712	5.3862	2.00841	1.18679	0.273875	1.55196	0.639041	1.27808	140.498	10.0421	170.076	481.654	134.016	20.0841	6.75558	1.91712	5.93395	1.55196	25.9268	4.56458	6.39041	82.6189	17.528	602.707
Tl1t4	PL	4	3.75383	8.2955	2.36352	7.83206	2.40987	1005.52	12.9299	521.458	2.78061	45.7411	1.52934	2.82696	4.03189	16.452	10.1492	4.12458	11.6786	63.7224	665.864	63.1199	0.695153	0.880528	11.8176	6.62713	7.78572	12.0493	1.25128	1.0659	0.185374	0.834184	171.147	13.1616	200.204	577.858	160.673	25.2572	4.44898	2.68793	5.23682	0.185374	30.5404	2.45621	8.43453	122.44	20.2985	677.172
Tl1t6	PL	6	3.37607	0.769231	2.77778	0.17094	2.35043	1052.22	8.33333	529.573	1.62393	42.9487	1.96581	1.7094	4.01709	19.5726	11.8376	4.23077	10.641	55.7265	644.487	63.7179	0.34188	0.0854701	18.8462	6.28205	7.47863	10.8974	1.75214	0.128205	0.598291	0.598291	163.718	11.9658	171.453	512.778	157.137	12.6496	3.97436	3.54701	3.54701	0.299145	27.8205	3.46154	8.80342	150.47	20.5983	683.974
Tl1t8	PL	8	3.67688	1.57581	4.01114	2.05332	2.53084	1203.29	10.8874	624.592	2.9606	45.2686	1.33705	2.05332	3.43812	14.8985	13.848	4.48866	13.8002	74.8269	794.349	79.8408	1.3848	2.91285	13.5615	7.59252	9.40708	13.084	2.10107	1.05054	0.191007	0.0477517	201.464	16.3311	230.068	677.501	185.706	28.5078	4.63191	3.67688	7.115	0.334262	37.3896	3.62913	12.4154	166.176	25.8337	1003.22
Tl1t10	PL	10	2.92895	1.31803	3.90527	0.82987	2.63606	943.562	8.54278	664.774	3.17303	53.7951	1.855	2.97777	5.8579	10.4466	11.2765	4.73514	12.8874	73.4191	883.323	85.8183	0.0976317	1.75737	12.3992	7.56646	9.42146	12.5945	0.683422	0	0.390527	0.244079	232.168	19.1846	272.929	820.595	119.257	119.16	5.80909	0.341711	6.34606	0.244079	49.0111	3.02658	14.9377	215.913	30.0706	1237.77
Tl1t12	PL	12	4.13537	6.79721	4.27796	8.17567	3.27977	1151.15	17.7773	631.19	3.6125	42.8747	1.47352	3.13717	5.32369	13.1191	14.6401	5.32369	12.929	75.9576	786.29	82.9925	1.23586	2.80444	11.9308	7.22501	8.65099	12.6913	1.42599	0.950659	0.475329	0.617928	202.538	15.4482	220.6	677.059	185.236	32.3224	4.51563	2.47171	7.46267	0.522862	39.69	2.42418	12.1209	182.289	26.5234	1125.34
Tl1t14	PL	14	4.49544	0.606127	5.10157	0.101021	3.83881	1406.87	11.87	766.296	4.59646	44.4493	1.86889	1.86889	5.00055	14.0419	16.82	4.64697	14.8501	91.0201	909.443	95.0104	0.505106	0.101021	38.4891	9.79906	9.14242	17.5777	2.77808	0.707148	0.353574	0.151532	237.955	18.8405	273.414	818.12	212.902	53.0866	5.80872	4.39442	10.1021	0.252553	48.7427	2.82859	14.7491	248.007	30.3569	1274.08
Tl1t16	PL	16	3.82152	15.7175	4.99263	1.35602	4.06807	1481.15	9.49216	800.239	9.73871	48.2005	2.40386	0.0616374	4.37626	93.0725	11.0331	9.49216	16.0874	105.338	936.334	93.9354	10.7249	5.23918	22.436	9.86199	11.1564	18.6145	3.88316	2.9586	2.52713	0.801286	241.434	21.8196	294.195	898.673	219.429	70.9447	6.47193	4.12971	10.4784	1.84912	54.6107	6.04047	16.7037	241.557	85.6144	1297.34
Tl1t18	PL	18	4.20716	15.3561	6.62627	0.315537	4.25975	1307.27	9.36092	636.122	4.36493	45.4373	0.315537	3.62867	0.210358	6.36332	10.0446	0.736252	12.8844	83.5647	722.842	85.5631	1.20956	3.31314	13.3051	8.72985	15.9872	22.8238	0.94661	1.68286	0.368126	0.525895	174.702	13.3577	188.481	572.752	181.539	9.4661	5.52189	6.31074	14.6199	3.36573	32.8684	3.4709	10.8334	133.472	20.2995	875.246
Tl1t20	PL	20	2.55833	17.0971	4.61747	1.18557	3.4943	1477.59	9.67173	793.768	13.9772	55.0977	2.30874	0.686381	4.11829	100.648	10.0461	9.54693	13.2284	90.9767	873.014	90.7271	6.73901	1.62235	36.0662	9.29734	11.2941	15.1004	3.11991	2.68313	1.55996	0.748779	214.65	17.3467	228.627	676.522	221.701	17.0971	6.98861	8.42377	5.74064	1.68475	44.7396	3.30711	17.8459	288.966	77.4362	1244.22
Tl1t22	PL	22	4.69196	18.3299	4.50428	1.93934	3.81613	1694.61	12.1991	906.55	11.5735	53.5509	2.25214	0.187678	5.31756	80.952	14.3887	11.0105	18.3299	119.989	942.146	100.846	5.50524	3.31565	49.985	12.7621	13.3877	18.8304	4.6294	3.81613	1.31375	0.563035	233.847	24.2731	342.701	995.572	289.15	55.5528	5.94315	4.69196	14.5138	4.31661	61.3709	5.81803	19.2058	275.137	68.6903	1444
Tl1t24	PL	24	7.7241	21.0333	5.28804	0.950659	6.11987	2150.87	14.3787	1093.38	12.0615	53.1181	2.13898	0.297081	4.21855	180.625	18.8943	9.03126	23.0535	152.581	1064.62	110.217	10.3384	2.07957	99.4033	17.7654	17.8249	25.9055	6.17928	3.92147	0.594162	0.77241	265.947	30.3022	432.55	1253.44	358.458	84.9057	8.31826	11.3485	21.8652	5.10979	77.4787	22.2216	20.6174	359.646	144.262	1609.29
Tl2t0	PL	0	5.43025	8.84449	3.80443	1.43073	4.45476	1005.34	9.10462	509.989	3.21913	34.1748	0.130066	4.87747	0.162582	8.06409	12.8765	1.20311	24.5174	136.862	505.534	68.6423	0.715363	2.24364	19.8351	9.4623	7.60886	23.1517	2.99152	1.46324	0.65033	0.325165	110.946	8.16164	186.612	536.685	203.391	8.03157	2.5688	4.87747	8.12912	3.41423	28.517	6.34072	6.56833	76.3162	14.3723	534.539
Tl2t1/2	PL	0.5	4.14508	1.51174	2.97471	0.633954	3.121	942.055	10.0457	572.558	3.80372	43.9379	0.146297	2.63335	3.46236	22.3834	12.4352	3.55989	32.3316	154.246	593.186	83.8282	1.26791	1.99939	15.0686	6.33954	1.51174	0.877782	3.65742	0.877782	0.585188	0.682719	117.33	7.65621	175.898	494.971	155.514	32.1366	5.80311	11.5575	5.46175	0.438891	29.6495	1.60927	8.97288	142.835	19.7013	738.605
Tl2t1	PL	1	5.54	1.81398	2.50036	2.74549	4.65752	1336.61	17.1103	727.505	5.68708	46.3301	2.45133	2.30425	2.89257	24.072	12.5998	4.02018	30.1513	170.809	746.037	91.8758	3.8731	1.27469	23.2386	10.982	10.2466	17.8457	3.33381	0.833452	1.37274	1.07858	160.464	13.1881	271.264	780.895	276.461	24.4643	3.03965	12.845	8.97186	0.686372	47.6048	2.99062	10.2466	169.044	23.2386	883.41
Tl2t2	PL	2	5.48032	25.9476	1.90133	34.951	7.88495	1287.43	51.1683	719.879	5.08887	48.2044	0.615138	2.12502	3.52306	28.0726	10.1777	6.65467	28.6878	160.942	740.123	90.0338	1.62173	2.40463	19.4607	10.3455	9.45075	15.2666	2.68424	1.84541	1.34212	0.0559216	157.867	12.862	267.361	775.745	274.463	20.4673	5.98361	11.408	7.60534	0.503295	47.5893	3.24345	10.4014	180.515	25.5003	929.585
Tl2t3	PL	3	5.3126	4.86617	2.58934	5.49118	4.68759	1251.32	16.3842	696.799	5.7144	45.7152	0.7143	2.94649	4.06258	20.804	12.411	0.669656	31.3399	166.476	738.318	95.1804	1.60717	1.83039	11.2502	10.1341	10.3127	16.3396	3.83936	1.83039	0.937518	0.401794	151.878	12.902	261.702	778.006	252.862	36.0275	4.64295	6.25012	8.83946	0.133931	46.0277	1.87504	10.0002	151.789	25.0005	930.152
Tl2t4	PL	4	6.27558	0	0.614392	0.526622	4.78348	1383.7	13.2972	765.621	5.79284	53.2327	0.702163	1.79929	3.20362	47.1766	11.3224	5.31011	40.1988	211.395	804.547	97.6445	1.36044	3.11585	43.1391	11.2346	11.849	17.0274	4.69571	0.921589	1.05324	2.10649	165.842	14.7015	289.467	852.777	285.473	28.7448	4.7396	11.9368	9.12812	0.175541	51.6967	3.99355	11.849	172.732	29.5347	934.974
Tl2t6	PL	6	6.34273	1.63205	2.15134	1.03858	4.85905	1439.13	14.2062	813.279	6.56528	47.7003	1.55786	3.33828	3.44955	44.5475	14.503	4.45104	35.1632	187.166	848.739	104.822	1.33531	0.74184	46.8101	12.092	10.3858	19.362	5.30415	1.29822	0.74184	1.18694	175.593	16.0237	300.816	871.588	293.731	17.0623	5.30415	10.9421	7.71513	0.222552	52.003	3.7092	12.0549	193.472	36.4243	966.024
Tl2t8	PL	8	5.16206	41.0304	2.76729	35.9216	9.20656	1263.69	57.3148	855.412	6.70536	75.5683	2.1819	2.66086	4.73632	111.277	12.7189	10.0048	30.2805	158.108	888.566	103.827	0.319303	0.478954	110.106	10.5902	8.72761	15.1137	7.87614	1.43686	1.33043	1.27721	185.142	14.3154	268.055	816.883	287.745	18.2535	6.49249	18.626	2.98016	0.212869	51.2481	4.73632	13.8365	299.08	84.1895	1247.94
Tl2t10	PL	10	4.37874	3.73188	3.33381	3.88116	3.13478	943.818	15.3256	779.565	9.65313	87.6743	2.13961	3.18454	5.42367	18.0125	9.55362	7.76231	29.8551	148.728	948.246	113.3	1.54251	3.68212	27.2676	7.414	7.31449	13.6338	4.97584	0.796135	0.746376	0.746376	201.671	15.8729	299.098	896.448	101.308	189.629	8.55845	6.41884	7.414	0.0497584	60.8048	2.93575	17.0174	285.464	30.5517	1476.88
Tl2t12	PL	12	5.71285	2.63288	3.67609	2.73223	2.98062	1494.83	16.5424	852.456	7.40186	48.0873	1.63934	2.78191	4.57028	14.0586	14.7044	0.347738	39.1951	196.522	946.445	117.188	1.58966	6.50768	15.3998	10.6309	11.376	18.8772	5.11672	1.83805	0.496769	0.0496769	200.297	16.7411	287.977	880.275	268.454	33.2835	7.15348	5.06705	9.43861	0	58.0723	2.98062	16.3437	243.119	30.7003	1401.19
Tl2t14	PL	14	8.58943	4.29471	3.88076	3.77728	5.84702	2099.18	23.7503	1146.07	7.81327	56.5557	1.65579	3.88076	4.3982	27.1654	18.5242	4.44994	50.6569	269.066	1178.1	138.621	1.86277	1.13836	39.1699	18.8346	17.1271	30.6839	8.95163	4.036	2.32846	0.465692	262.805	25.3026	447.375	1323.75	381.039	77.9775	11.1766	12.6772	19.8695	0.620922	88.2227	3.36333	19.766	297.008	37.1001	1543.56
Tl2t16	PL	16	6.62687	15.7015	3.10448	0.537313	4.0597	1841.85	17.791	1027.1	12.8358	57.6119	2.26866	0.119403	3.28358	195.224	18.6269	8.89552	38.6866	212.836	946.925	113.313	8.77612	2.74627	153.313	14.6269	14.1493	21.4925	5.73134	3.40299	2.50746	1.25373	206.985	17.3134	304.239	898.388	306.985	25.791	8.83582	23.1642	8	3.52239	59.9403	7.70149	18.0299	370.209	138.806	1374.99
Tl2t18	PL	18	5.84521	16.4138	4.66436	4.19202	5.25478	2032.54	17.8899	1117.67	8.97446	55.7951	2.3617	0.413297	5.31382	96.3573	22.3181	9.4468	41.2117	237.764	1175.18	138.218	6.84893	5.84521	26.2739	17.5356	16.8862	26.2149	6.31755	5.19574	1.77127	0.826595	268.761	23.0266	379.584	1112.12	372.912	31.1744	12.576	9.09254	9.91914	3.77872	78.0542	1.47606	24.7978	343.922	77.759	1904.3
Tl2t20	PL	20	4.34895	16.3415	4.74431	5.40324	5.00788	1846.59	14.4306	1107.14	17.4617	57.6565	1.84501	0.263573	5.13966	79.9284	21.6129	9.35683	37.0978	227.463	1178.1	144.372	12.3879	4.08537	23.8533	15.5508	15.419	26.0278	7.51182	3.8877	1.18608	0.0658931	264.495	23.5897	379.281	1081.97	299.287	80.9827	12.3879	5.99628	14.2988	4.48073	77.8857	9.55451	28.2682	347.784	65.8931	1998.54
Tl2t22	PL	22	7.194	19.3822	3.50782	0.0594546	8.68037	2605.95	24.9115	1412.58	14.5664	67.1242	1.48636	0.237818	3.98346	187.401	29.9651	8.26419	39.0022	253.574	1154.85	130.087	10.5235	3.27	203.394	20.9875	19.3227	31.7487	7.49128	5.70764	4.22127	2.616	267.427	28.4787	467.729	1273.99	390.914	83.1769	13.1989	35.1971	21.0469	5.94546	86.8037	20.274	22.3549	540.085	135.438	1755.52
Tl2t24	PL	24	8.10976	20.9756	4.7561	1.64634	9.63415	2833.9	26.8293	1570.98	23.1707	82.1341	2.7439	0.914634	5.73171	185.732	31.8293	9.39024	41.7683	293.232	1505.37	163.659	3.23171	3.35366	172.744	22.6829	20.6098	36.2195	2.2561	13.9634	1.64634	1.28049	332.378	32.7439	551.707	1443.54	406.524	98.8415	14.8171	22.1951	23.1707	1.76829	100.549	7.62195	32.2561	572.805	141.463	2215.12
TlTt0	PL	0	2.92208	6.17949	1.5808	7.28126	1.82032	667.385	14.6583	327.992	1.00596	29.3646	1.91612	1.72451	3.49692	22.8018	7.32916	3.92805	4.55079	28.5023	428.972	41.2445	6.3232	4.55079	13.7482	3.01789	0.47903	8.90996	1.48499	0.718545	1.72451	0.718545	103.518	5.02982	96.333	275.251	72.4773	13.1733	2.10773	3.01789	2.63467	0.574836	14.1314	2.25144	5.46095	99.0635	18.3948	509.257
TlTt1/2	PL	0.5	2.89546	5.16147	1.09104	1.63656	1.09104	803.175	4.82576	377.375	1.46871	32.6893	0.293742	1.00712	0.839263	3.35705	6.79803	0.125889	9.106	49.5165	456.475	47.3344	0.587484	1.63656	5.62306	5.83288	20.8137	19.387	0.587484	0.503558	0.377668	0.881226	133.149	9.73545	157.572	461.259	152.914	1.30086	4.57398	2.7276	9.39974	1.04908	25.6814	3.69276	8.01496	71.7989	18.4218	609.305
TlTt1	PL	1	4.33832	36.3208	2.11872	44.2912	3.63208	797.797	56.146	385.051	2.06827	30.9736	1.56381	3.12763	2.72406	22.8014	6.55793	7.56684	7.26417	39.4989	463.141	42.0212	0.908021	1.21069	17.7064	3.9852	4.94367	9.28199	7.21372	1.36203	0.302674	1.31159	119.657	8.37397	143.215	412.342	120.313	8.37397	1.26114	4.94367	2.82495	0	19.4216	2.21961	6.10392	117.69	17.202	528.317
TlTt2	PL	2	3.37144	4.82823	0.915699	1.24868	0.0416227	921.776	5.70231	412.647	2.08113	38.4594	1.24868	0.0832454	1.04057	6.95099	7.20072	0.0832454	9.07374	55.5247	554.997	55.9825	0.124868	3.1217	13.7771	6.99261	18.4388	20.6448	0.0416227	0.998944	0.249736	1.20706	157.209	11.0716	161.246	525.445	166.074	8.28291	6.11853	3.78766	9.48997	4.24551	25.1401	3.45468	7.32559	80.2069	19.4794	738.178
TlTt3	PL	3	2.9969	1.5921	0.234132	1.35797	1.82623	923.044	7.16445	458.712	2.34132	34.0429	1.91989	1.31114	3.69929	19.8076	8.24146	4.7763	8.28829	44.9534	552.834	52.8671	0.187306	1.45162	19.4798	4.86995	0.374612	15.9678	1.63893	0.749224	0.280959	0.702397	138.56	8.85021	143.195	413.478	113.226	18.1687	1.03018	4.49534	3.93342	0.140479	20.791	3.41833	8.42877	152.233	19.8076	630.191
TlTt4	PL	4	3.53116	1.92609	1.55921	0.504451	1.74265	1067.14	7.47505	507.799	2.4764	36.7332	1.78851	3.11843	2.88913	17.7475	7.9795	4.58592	10.8686	65.8997	704.673	60.3049	0.825466	2.06366	14.8125	7.93364	8.11708	13.8953	1.55921	1.55921	0.229296	2.84327	182.749	13.0699	202.927	624.969	161.791	35.9536	4.67764	3.76046	6.42029	0.229296	32.1014	2.06366	9.95145	114.694	23.8009	660.831
TlTt6	PL	6	4.45643	0.597814	2.01083	0.978242	2.5543	1220.79	10.5433	564.011	2.60864	60.2706	2.49995	2.98907	4.29339	23.0974	6.90204	5.1086	12.065	70.8682	766.072	56.3032	0.760855	0.597814	34.0754	8.15201	0.0543468	22.8256	2.33691	1.90214	0.380427	0.923895	197.877	13.315	208.42	649.715	206.409	8.69548	5.16294	7.60855	3.53254	0.760855	32.6624	5.27164	9.34764	149.291	22.8256	458.252
TlTt8	PL	8	3.72017	2.98662	2.41025	3.301	1.04794	1255.16	12.4704	646.891	2.51505	44.2753	0.419174	2.56744	4.9253	12.2084	9.37902	4.66331	12.3656	78.5952	840.497	79.2239	0.733555	0.0523968	9.53621	8.22629	9.11704	15.5618	2.51505	1.20513	0.471571	0.104794	222.005	15.1951	238.563	696.825	194.34	20.3299	5.50166	1.93868	6.18282	0.419174	39.6644	3.1962	13.6756	187.685	30.0757	1109.61
TlTt10	PL	10	3.25216	0.567838	2.42621	1.1873	3.14892	1111.72	10.3243	754.863	5.47189	54.3059	1.65189	3.0973	5.9881	13.9378	9.65324	4.80081	13.8862	82.4397	928.879	84.9691	2.06486	1.34216	26.1205	8.72405	9.70486	17.3965	2.6327	2.47784	0.464594	0.671081	257.901	18.6354	281.802	813.608	147.276	97.3583	3.92324	4.69756	4.12973	0.0516216	46.6659	3.71675	15.28	262.909	31.5408	1211.25
TlTt12	PL	12	5.34607	0.967385	1.98568	1.42562	2.85124	1635.95	13.4925	840.505	3.46222	48.7256	0.356405	3.76771	6.1098	53.1043	11.5068	3.76771	17.8712	106.82	985.816	95.0074	1.06921	2.18934	96.9931	11.3031	14.4599	19.3986	3.51313	2.49483	0.967385	0.865555	279.32	22.0971	322.088	916.317	234.056	47.8092	5.4479	5.80431	10.3357	3.76771	52.5443	5.39699	17.3111	273.617	48.9802	1351.18
TlTt14	PL	14	4.78998	0.21528	2.4219	0.21528	2.79864	1512.07	12.1633	809.4	3.33684	49.2453	2.36808	4.41324	6.88897	10.5487	12.5939	3.82122	19.2676	115.336	1028.56	99.0827	0.43056	1.77606	31.7538	11.7328	15.0696	22.6044	1.72224	3.28302	0.32292	1.29168	290.359	24.1114	341.973	977.48	225.237	62.7542	6.02785	4.8438	12.1095	0.807301	61.8392	4.0365	18.0835	242.352	38.4813	1361.11
TlTt16	PL	16	4.25241	11.7095	2.89657	0.73955	4.25241	1515.15	10.0456	786.881	9.36763	48.6254	2.89657	0	3.45123	106.31	10.97	9.55252	19.1667	112.473	966.099	93.1833	8.81297	3.57449	27.6715	11.4014	12.3258	23.2342	0.123258	0.862808	1.4791	0.554662	268.518	23.8505	312.028	921.664	186.798	86.8355	7.14898	5.54662	11.463	4.37567	55.4046	0.862808	20.6458	269.812	85.4796	1370.26
TlTt18	PL	18	5.92195	12.029	3.02266	3.3311	2.46748	1413	8.63618	716.371	9.4998	48.3626	2.34411	0.061687	4.7499	95.7999	7.64919	9.56149	14.3114	82.8456	842.336	84.8196	4.99665	5.30508	54.3463	7.09401	10.9186	13.9413	0.925305	0.493496	1.11037	0.555183	225.034	15.2367	200.113	602.189	166.617	22.2073	5.49014	8.88293	7.95762	3.94797	34.4213	11.5355	14.0646	307.263	72.2355	1245.4
TlTt20	PL	20	5.10686	14.8737	3.63863	3.76631	4.40466	1801.32	12.1288	910.935	10.2775	57.899	2.48959	0	5.17069	82.2204	13.0225	9.63919	22.0233	132.97	1159.7	116.692	8.10713	2.80877	16.4058	13.4055	16.6611	24.3214	0.702193	0.829864	1.08521	0.0638357	320.264	27.194	344.011	1035.41	266.131	48.4513	7.59645	2.87261	10.9159	5.42603	64.1549	6.51124	21.6403	297.474	80.816	1761.35
TlTt22	PL	22	3.90145	14.1815	3.71567	0.185784	4.70652	1900.81	12.5714	942.913	12.3236	60.6893	3.3441	0.247711	4.27302	97.2267	11.7663	8.79375	20.56	119.335	1020.76	102.057	9.47496	5.44965	56.9117	12.3236	14.3053	21.0555	0.619278	0.681206	0.495423	1.67205	278.923	23.7803	313.665	925.016	241.766	50.4093	7.05977	14.4911	13.4383	2.84868	52.7625	12.6333	17.3398	373.177	85.6462	1519.71
TlTt24	PL	24	5.05291	12.3858	3.51239	0.431346	4.37508	1944.51	13.4334	984.517	13.9879	65.0717	2.71132	14.8506	6.83992	179.687	15.282	9.11989	25.8808	160.276	1155.02	105.248	10.1674	5.23778	102.969	13.8031	16.4528	31.365	0.246484	0.801072	1.4789	1.72539	311.186	26.4354	336.697	977.184	261.95	56.075	8.31882	23.4159	14.9123	3.88212	71.6035	8.81179	19.7187	359.866	139.14	1444.21
Tl1t0	NL	0	2.29715	1.58712	1.00239	2.17185	0.0835326	712.825	5.42962	384.459	2.38068	133.903	0.250598	1.33652	0.584728	0.960625	4.92842	5.09549	6.01435	10.6086	895.01	18.9201	0.584728	35.7102	6.01435	0.167065	0.79356	0.668261	24.6839	1.04416	3.67543	3.04894	292.28	3.3413	23.4727	108.467	28.5264	3.88427	3.7172	2.25538	13.2817	2.13008	19.9225	1.37829	10.7339	24.308	15.1194	162.471
Tl1t1/2	NL	0.5	0	1.43273	0.678661	1.73436	0.829474	722.924	4.37359	377.863	1.54584	124.987	0.0754067	0.45244	0.565551	3.01627	4.4867	3.95885	4.07196	12.1405	891.308	20.9254	0.829474	35.5543	2.67694	0.263924	0.263924	0.716364	21.0008	2.2622	2.86546	3.95885	273.84	3.46871	25.1481	102.402	28.0136	3.77034	3.65723	3.12938	11.3864	0.150813	16.2125	1.35732	8.63407	29.1447	14.8551	162.69
Tl1t1	NL	1	0.316332	1.26533	0	0.237249	0.316332	758.723	2.68883	414.633	3.24241	158.245	0.158166	0.474499	42.2304	2.05616	1.66074	3.47966	1.4235	11.0716	1362.21	23.6458	13.2069	13.365	17.3192	0.395415	0.474499	0.0790831	43.4166	1.97708	0.158166	0.158166	363.545	0.0790831	23.3295	104.548	15.0258	15.9748	3.55874	0.395415	14.4722	1.97708	29.7352	56.6235	11.8625	17.3192	14.314	180.389
Tl1t2	NL	2	2.32203	1.4813	0.200175	1.6014	0.16014	526.701	3.52308	283.328	1.88165	110.617	0.440385	2.04179	0.560491	3.0827	3.44301	4.564	3.8834	7.96697	662.3	14.6528	1.92168	26.5032	6.9661	0.040035	0.0800701	0.800701	21.8591	1.12098	3.24284	4.24371	197.293	2.44214	16.4944	78.2685	19.417	2.4021	2.20193	0.800701	7.92694	0.480421	11.6102	1.68147	6.32554	13.692	8.64757	91.1198
Tl1t3	NL	3	2.41153	4.73374	0.0893158	1.87563	0.178632	847.339	6.07347	429.43	1.42905	159.697	16.3448	0.803842	13.7546	0.446579	0.178632	2.76879	2.32221	13.3974	1449.42	25.187	2.41153	10.6286	3.84058	0.0893158	0.267947	0.535895	56.8048	1.87563	1.96495	0.893158	384.236	4.91237	27.4199	130.758	18.399	5.18031	4.37647	0.535895	18.0418	28.0451	47.0694	5.35895	16.3448	62.8783	85.6538	258.748
Tl1t4	NL	4	4.79872	3.26721	0	0.1021	0.510502	881.944	6.84073	461.494	3.77772	175.919	16.8466	7.14703	13.0689	4.08402	0.408402	4.28822	2.24621	14.6004	1490.16	24.9125	3.47142	1.53151	81.7825	0	0.1021	3.06301	68.5094	2.96091	0.306301	0.816804	393.087	4.69662	31.6511	141.409	17.5613	8.78064	3.67562	1.42941	17.4592	27.5671	47.4767	8.06594	15.7235	35.531	100.467	509.175
Tl1t6	NL	6	2.31164	3.55002	1.07326	0.165117	0.412793	860.343	5.86166	460.512	2.72443	161.485	15.9338	5.28375	12.3012	3.63258	1.65117	2.55932	2.22908	15.1908	1372.37	26.5013	3.3849	1.65117	2.47676	0.165117	1.98141	0.412793	56.5526	2.47676	0.825586	0.495352	359.46	8.33842	37.6467	140.102	17.9152	4.21049	2.72443	0.330234	16.0989	26.749	45.077	7.10004	15.2733	59.1945	20.8048	354.011
Tl1t8	NL	8	4.52212	2.36873	1.93805	0.646017	0.430678	678.964	5.16814	390.625	2.36873	160.643	13.5664	2.15339	18.0885	2.36873	1.0767	15.7197	0.646017	0.215339	541.362	113.053	0.861356	2.15339	4.73746	1.50737	0	7.32153	9.69026	1.0767	4.09144	1.93805	42.4218	0.215339	3.23009	20.4572	4.52212	4.9528	0.646017	0.646017	0.861356	4.52212	48.882	9.47492	4.52212	45.8672	79.4601	36.3923
Tl1t10	NL	10	2.85215	6.78616	2.5571	1.86865	0.1967	845.91	5.70431	439.625	2.45875	169.064	18.8832	0.983501	15.1459	4.22906	4.22906	4.91751	1.967	15.5393	1469.74	23.2106	2.06535	2.85215	1.3769	0.1967	0.491751	0.590101	77.2049	4.32741	1.967	0.393401	364.781	6.68781	28.6199	137.985	16.7195	5.31091	2.65545	1.3769	19.5717	26.8496	49.6668	6.39276	17.6047	30.5869	20.0634	274.889
Tl1t12	NL	12	2.69006	4.7076	0.288221	2.49791	0.288221	888.296	10.5681	497.949	4.51546	197.527	17.8697	4.80368	17.2932	7.20551	3.2665	3.93901	5.38012	15.9482	1478.19	25.2673	3.45865	1.34503	1.72932	0.864662	1.63325	0.960735	67.2515	2.11362	0.960735	0.288221	359.123	8.3584	37.949	205.309	29.1103	4.32331	1.4411	0.960735	18.0618	24.6909	52.0718	5.28404	18.8304	35.4511	24.9791	300.902
Tl1t14	NL	14	3.8636	7.82627	1.1888	3.5664	0	969.665	9.70854	546.948	4.35894	208.536	20.3087	4.85427	20.3087	2.3776	7.13281	4.85427	6.73654	17.4358	1612.21	26.5499	4.95334	0	21.3984	0.891601	0.594401	1.88227	77.4702	3.07107	0.495334	0.891601	382.001	7.62814	41.1127	225.179	32.3948	7.82627	4.7552	0.495334	20.3087	25.8564	55.5765	4.7552	15.5535	42.995	43.094	406.471
Tl1t16	NL	16	7.59925	8.5798	2.57394	0.85798	2.81908	1016.09	5.88329	558.913	10.9086	204.812	22.4301	0.85798	0.122569	42.5313	5.76072	14.8308	2.20624	17.037	1666.2	28.6811	6.49614	21.9398	0.980549	2.45137	0.122569	3.67706	86.4109	3.18678	6.12843	0.612843	376.653	11.1537	56.1364	279.089	50.1306	10.5409	20.2238	1.34825	0.245137	22.9203	62.6326	23.5332	24.146	63.7357	4.65761	383.762
Tl1t18	NL	18	4.8141	11.7819	0.760121	1.52024	2.15368	1075.95	7.47452	611.264	12.1619	217.521	21.2834	0.760121	23.9438	198.138	5.19416	9.75489	2.78711	18.1162	1688.61	29.138	5.70091	1.52024	3.29386	2.78711	0.380061	4.43404	86.0204	4.18067	2.78711	1.52024	379.807	15.0757	68.0308	323.938	65.6238	9.88158	18.1162	2.28036	0.253374	23.057	60.683	11.2751	15.8359	88.9342	110.851	416.926
Tl1t20	NL	20	9.42347	10.7697	1.75007	1.48083	0.403863	1251.98	6.86567	698.952	14.6737	209.74	23.0202	1.21159	25.578	64.4835	7.6734	13.1929	3.50015	26.3857	1863.69	34.463	5.1156	13.866	2.5578	4.98098	0.807726	6.46181	94.504	4.03863	5.38484	2.15394	413.556	13.4621	91.9462	408.979	90.0615	2.01932	21.674	5.7887	0.134621	23.1548	65.8297	3.63477	29.0781	119.678	0.673105	539.023
Tl1t22	NL	22	5.79545	10.1136	0.681818	1.81818	0.568182	867.045	3.97727	453.864	7.95455	155.909	18.5227	2.61364	21.25	48.5227	4.31818	12.8409	1.13636	17.1591	1458.18	20.5682	5.56818	0.113636	1.25	2.15909	0	2.72727	98.5227	3.63636	2.27273	2.84091	315.682	9.20455	42.8409	226.591	35.3409	0.113636	15.5682	4.31818	0.568182	18.9773	50.9091	6.70455	12.3864	41.9318	2.15909	277.841
Tl1t24	NL	24	2.64368	0.881226	0.587484	0.881226	0.587484	945.262	8.51852	518.748	16.1558	181.533	2.05619	0.587484	8.51852	187.114	3.81865	7.93103	0.293742	9.106	647.995	61.3921	29.6679	0	7.63729	1.46871	4.99361	9.39974	46.08	6.46232	4.69987	0.881226	29.9617	1.17497	27.7867	50.5236	24.6743	0.881226	4.11239	1.76245	11.1622	5.87484	62.2733	0.853333	8.16	108.685	8.85333	175.733
Tl2t0	NL	0	4.42308	5.37088	1.39011	1.57967	0.221154	409.924	3.91758	229.621	2.74863	74.3709	0.473901	0.0315934	0.252747	3.00137	3.22253	11.9739	9.38324	17.5659	482.968	12.511	0.315934	0	3.19093	0.631868	0.789835	1.23214	46.9478	1.29533	9.50962	8.21429	129.565	3.09615	24.1374	128.206	41.5769	1.8956	1.9272	0.979396	6.41346	1.23214	10.0467	2.81181	4.48626	33.331	7.6772	174.712
Tl2t1/2	NL	0.5	2.43445	2.78223	1.08198	2.12531	0.0772841	293.641	3.51643	170.643	1.31383	70.599	1.12062	0.231852	0.811483	0.309136	2.70494	4.28927	5.98952	8.11483	380.199	6.83964	0.154568	18.5482	2.62766	0.347778	0.270494	0.270494	33.6186	1.12062	8.50125	1.50704	101.744	1.89346	12.2882	33.5799	19.0505	1.97074	0.772841	1.27519	5.95087	1.39111	6.801	1.70025	4.63704	19.4369	5.44853	106.343
Tl2t1	NL	1	3.84567	4.67823	0.436107	1.90301	0.792921	298.535	3.48885	177.099	0.951505	63.6319	0.713629	0.555045	0.0792921	1.07044	3.09239	7.61204	7.81027	10.0701	348.806	8.24638	0.673983	17.9993	3.44921	0.0792921	0.555045	0.792921	34.056	1.30832	8.20673	4.71788	91.6617	2.0616	19.7437	99.3134	28.0694	0.991151	1.50655	1.70478	4.9954	1.34797	6.97771	1.4669	2.93381	22.9154	4.51965	115.33
Tl2t2	NL	2	4.12965	5.25988	1.13022	2.13003	0.47817	365.627	3.99924	212.786	1.82574	81.8106	0	0.30429	0.47817	3.9123	3.26025	11.7804	9.21565	9.78076	471.389	8.25931	0.565111	25.5169	5.30335	0.0869401	0.13041	0.956341	35.2977	1.43451	9.38953	10.1285	120.064	1.95615	16.6056	96.7208	25.6908	1.7388	0.825931	2.52126	5.73805	0.4347	8.17237	2.39085	6.47704	28.2555	6.25969	131.366
Tl2t3	NL	3	2.88285	2.69686	0.37198	1.30193	0.464975	333.201	3.25483	207.1	2.41787	88.3453	11.0664	0.55797	9.3925	9.48549	3.06884	4.37077	1.9529	11.0664	809.336	9.20651	2.13889	4.64975	0.650965	0.650965	0.092995	0.836955	86.2994	2.04589	2.23188	0.836955	145.072	0.464975	16.8321	99.3187	13.5773	1.67391	0.18599	0.278985	7.16062	12.6473	27.0616	4.92874	3.90579	28.5495	13.6703	223.653
Tl2t4	NL	4	4.17044	1.56392	0.96241	2.76693	0.521306	300.833	3.32834	183.219	1.60402	62.5968	0.120301	0.160402	0.200502	0.240603	3.36844	8.10029	6.05516	11.5088	312.142	8.74189	0.200502	14.9174	2.48623	1.00251	1.64412	0.601506	44.2308	0.280703	6.17547	1.12281	80.8425	1.60402	27.2282	128.722	33.2834	0.601506	0.561406	0.761908	4.29075	0.481205	6.77697	2.52633	3.72934	24.9425	5.25316	127.038
Tl2t6	NL	6	6.25648	6.70337	0.521373	3.72409	0.148964	399.148	4.31995	238.044	1.71308	84.9093	14.5984	1.34067	13.0343	3.79858	6.40544	11.0233	4.54339	14.524	789.582	11.2468	0.595855	0.446891	2.75583	0.148964	0.446891	2.75583	103.977	2.4579	5.43718	0.670337	148.74	5.06477	24.6535	124.459	21.8977	1.04275	1.26619	0.670337	7.0013	12.5874	30.3141	3.79858	6.47992	40.2947	16.1626	295.47
Tl2t8	NL	8	3.96477	12.5203	0.834688	0.52168	0.417344	365.489	7.09485	258.858	1.25203	102.562	14.294	0.730352	10.7466	5.52981	4.27778	21.7019	2.50406	13.8767	876.214	5.32114	2.6084	0.52168	2.08672	0	0.208672	0.730352	94.3197	1.66938	3.23442	0.834688	140.228	1.25203	19.4065	97.9715	9.70325	1.4607	1.35637	0.417344	6.78184	12.3116	31.7181	5.00813	4.69512	36.4133	8.55555	204.603
Tl2t10	NL	10	4.96018	15.5614	0.389034	2.72324	0.194517	353.632	4.37663	235.463	0.778068	100.565	15.2696	2.3342	12.06	5.05744	2.43146	6.22454	3.59856	12.1573	808.996	11.9628	1.26436	1.94517	1.55614	0.486292	0.194517	0.194517	97.453	1.55614	4.37663	1.06984	130.618	3.40405	19.6462	98.7173	10.2121	2.04243	1.45888	0.291775	5.1547	13.2271	33.0679	5.1547	4.96018	28.3022	11.5738	198.504
Tl2t12	NL	12	5.70269	7.0033	1.20057	2.30108	0.800377	480.626	7.50353	302.042	2.10099	101.748	17.6083	4.20198	12.706	6.8032	5.00236	24.2114	3.70174	15.8074	960.452	15.9075	3.20151	4.50212	79.6375	1.20057	0.400188	2.60123	97.8461	0.500236	2.60123	0.500236	158.074	2.70127	36.4172	194.091	34.9164	3.20151	2.50118	1.00047	9.20434	17.008	37.3176	4.50212	8.20386	58.8277	55.226	483.528
Tl2t14	NL	14	11.3727	15.1315	0.578273	5.87911	0.481894	699.228	7.42117	422.717	4.33705	119.895	21.2997	2.60223	16.3844	5.0117	10.0234	32.576	5.58997	26.6969	1082.72	24.2875	1.54206	0.192758	3.1805	0.578273	0.867409	0.481894	134.641	2.69861	4.62618	0.867409	190.926	6.45738	75.561	313.231	76.8139	2.40947	1.54206	0.578273	9.05961	13.6858	38.2624	3.27688	7.13203	110.643	16.7699	495.387
Tl2t16	NL	16	4.94753	9.41238	0.482686	0.482686	1.44806	611.684	4.46485	368.169	6.51626	96.0546	17.3767	0	5.30955	312.66	3.3788	21.1175	3.3788	21.3589	1044.9	20.6348	5.67156	16.17	2.29276	1.56873	0.844701	2.05142	104.502	3.25813	1.93075	3.01679	175.698	5.67156	58.5257	261.978	59.4911	0.965373	10.1364	0.482686	2.65477	8.32634	40.063	11.4638	7.60231	114.276	19.6695	504.769
Tl2t18	NL	18	0.794931	0.529954	2.38479	0.264977	3.17972	511.935	4.50461	337.316	7.94931	105.991	18.8134	1.58986	4.23963	319.297	2.11982	7.41935	1.05991	6.35945	361.959	38.6866	1.05991	2.38479	15.6336	0.794931	0.794931	5.29954	44.4401	5.29954	7.94931	3.70968	112.255	1.32488	37.9367	52.9954	54.9022	0.794931	1.32488	4.23963	0.264977	15.1037	28.0876	3.15746	6.09447	88.5023	6.22067	229.599
Tl2t20	NL	20	8.54878	15.3375	1.25717	0.50287	0.377152	618.907	3.52009	378.284	7.29161	110.38	20.1148	0.754304	0.251435	186.942	4.14867	19.3605	2.38863	20.1148	1066.08	17.2233	4.77726	16.8461	10.1831	0.880022	0.125717	2.38863	104.974	1.76004	1.00574	2.26291	179.147	7.41733	56.95	258.349	58.5843	0	9.55452	0	1.38289	17.4747	40.8582	6.53731	17.6004	103.591	189.205	403.804
Tl2t22	NL	22	13.4202	18.6924	1.43787	0.119823	0.239646	574.191	2.99557	323.522	11.0237	107.122	21.6879	1.31805	1.43787	228.143	2.87575	26.8403	0.958583	15.3373	1136.4	10.4246	7.3092	19.7708	18.8122	2.03699	1.67752	0.119823	139.474	1.79734	2.75593	3.35504	186.444	3.83433	23.6051	171.227	15.6968	0	10.4246	0.479291	0.83876	16.895	44.3345	9.58583	18.3329	66.7413	154.811	336.103
Tl2t24	NL	24	8.39044	14.173	2.49445	2.04092	0	893.808	6.4629	497.757	10.7715	123.589	24.491	2.26769	0.113384	48.4151	7.48336	26.9855	2.83461	28.1193	1427.05	19.8422	8.95736	27.439	4.19522	2.38107	1.58738	4.98891	137.535	7.36998	3.28814	1.92753	228.583	9.07074	57.1457	258.063	47.508	0.680306	12.1321	2.60784	3.96845	14.3998	56.1252	2.94799	30.2736	62.5881	6.23614	336.184
TlTt0	NL	0	1.02559	0.427329	0.427329	1.53839	1.11106	613.517	4.44422	312.89	1.62385	111.789	0.256398	0.170932	0.170932	2.9913	4.05963	3.1195	2.86311	9.87131	812.054	15.8539	0.256398	30.3404	8.80298	0.384596	0.982857	0.598261	11.7516	2.77764	3.3759	2.43578	253.15	2.39304	14.8283	53.0316	17.9906	4.18783	4.23056	2.22211	9.74311	0.811926	15.4266	1.19652	8.46112	15.1702	17.1359	109.866
TlTt1/2	NL	0.5	7.37805	3.36352	4.01453	10.5246	1.30201	975.748	4.12303	478.055	3.58053	153.637	2.60402	0.542504	40.2538	0.976507	10.8501	6.40155	7.05255	15.6241	1595.18	30.4887	14.6476	15.7326	1.41051	0.868006	0.868006	1.19351	70.634	1.30201	5.42504	0.217002	409.265	7.37805	34.1778	135.518	15.2986	24.3042	7.48656	3.90603	14.4306	0.217002	36.6733	84.3051	12.5861	47.5234	19.0961	304.019
TlTt1	NL	1	1.77397	1.98516	0.422375	1.77397	0.3379	532.066	4.26599	296.465	1.73174	113.112	0.84475	0.211187	0.886987	1.14041	3.80137	4.68836	4.68836	7.68722	689.738	15.3744	1.18265	26.5674	4.94179	0.253425	0.886987	0.211187	17.7397	1.52055	3.67466	3.80137	215.791	2.40754	14.4452	46.9681	18.9646	3.379	2.95662	2.53425	8.57421	1.85845	13.5582	1.6895	8.06736	19.5137	12.2066	127.177
TlTt2	NL	2	2.65397	1.42601	0.237669	1.7429	0.198057	723.107	4.4761	357.414	0.0396115	120.34	0.27728	0.514949	1.10912	2.93125	4.75338	7.76385	5.50599	10.7743	895.179	17.7063	0.871452	34.3431	10.6555	0.356503	0.673395	0.316892	31.2534	1.82213	4.04037	2.97086	277.359	3.48581	26.6585	121.488	30.382	4.91182	4.23843	2.33708	11.4081	1.66368	19.1719	2.29746	9.50675	16.8349	15.1712	134.481
TlTt3	NL	3	0.831369	2.39019	0.831369	0.415685	1.03921	837.708	3.74116	418.387	2.80587	140.917	13.7176	0.519606	13.8215	1.87058	2.49411	13.3019	3.11763	13.3019	1499.37	24.0058	2.59803	0.103921	7.48232	0.727448	0.93529	0.519606	53.1037	1.76666	2.18234	0.519606	378.896	5.92351	27.9548	127.927	16.9391	0.207842	1.76666	0.103921	14.8607	24.0058	42.0881	8.8333	16.7313	30.5528	33.0469	371.102
TlTt4	NL	4	2.4854	2.81135	0.733397	2.32242	0.0407443	666.576	3.78922	340.5	2.03721	92.408	0.122233	0.488931	0.692652	2.68912	4.6041	5.45973	4.9708	10.7157	730.382	19.5572	0.855629	25.18	10.9602	0.366698	0.692652	0.937118	25.3022	2.40391	3.99294	3.17805	226.416	3.82996	42.8222	153.035	38.8293	3.62624	3.74847	1.99647	10.5935	1.34456	16.094	2.1187	9.41192	57.8976	14.3827	281.869
TlTt6	NL	6	6.25716	3.33997	0.126834	3.17086	0.465059	1219.17	6.93361	603.732	3.12858	138.038	0.0422781	0.0845562	0.169112	4.48148	7.99056	9.13207	10.485	23.0839	1165.69	45.4067	0.803284	40.4179	4.18553	3.04402	0.549616	4.86198	49.2963	1.94479	7.145	4.01642	362.112	9.25891	134.444	383.04	110.008	5.36932	7.06045	2.28302	15.8543	2.24074	30.6516	4.31237	16.108	140.448	25.6628	743.376
TlTt8	NL	8	1.07817	1.07817	0.32345	0.6469	0.107817	926.577	6.90027	473.854	1.2938	181.024	15.8491	4.74394	17.4663	0.97035	4.74394	2.47978	3.34232	16.496	1644.42	27.062	0.862534	0.431267	4.42049	0.215633	0	0.107817	67.9245	2.37197	2.26415	1.83288	411.321	6.79245	25.7682	132.291	14.6631	4.20485	0.431267	0.431267	17.8976	27.2776	46.0377	6.90027	18.5445	24.69	22.7493	273.639
TlTt10	NL	10	4.16658	1.49454	0.45289	4.5289	0.045289	760.085	4.71005	376.08	2.94378	128.485	1.2228	0.317023	1.53982	1.26809	4.89121	8.15201	8.65019	12.2733	947.853	20.063	1.13222	37.1369	0.634045	0.135867	1.31338	2.12858	35.0537	2.26445	5.88757	4.9365	288.128	4.5289	28.7585	134.961	35.733	3.75898	4.07601	1.08694	14.3566	1.49454	20.8329	2.58147	12.0016	18.6591	16.1229	149.227
TlTt12	NL	12	2.98118	8.55889	1.73101	2.01951	0.192334	1105.25	7.11638	543.056	5.0007	178.679	21.6376	1.82718	21.4453	0.480836	6.73171	4.13519	3.65436	20.8683	1713.6	31.2544	0.480836	2.78885	4.90453	1.15401	0.288502	0.192334	88.4739	2.78885	1.34634	2.69268	439.869	5.48153	50.1993	250.42	41.3519	5.0007	5.5777	0.192334	21.1568	30.6774	56.931	4.51986	16.5408	34.8125	21.0606	288.598
TlTt14	NL	14	1.93105	4.12543	2.19438	4.2132	0.3511	1082.62	6.58313	528.406	3.68655	157.995	19.3105	5.17873	21.2416	3.33545	5.61761	11.1474	2.98435	20.0127	1552.92	32.5646	3.59878	0	0.965526	0.526651	1.84328	2.72103	80.402	2.8088	1.22885	1.0533	394.725	4.65208	71.8878	306.774	62.1448	6.23203	4.2132	1.0533	18.9594	28.5269	51.3484	4.38875	15.9751	67.5868	21.066	371.728
TlTt16	NL	16	9.39486	5.56732	3.2476	0	1.04387	1109.4	7.19112	573.202	11.5986	173.747	22.9652	1.6238	25.2849	94.2965	7.19112	12.2945	5.45134	17.2819	1716.82	32.2441	8.235	1.97176	6.37922	2.89965	0.695915	1.39183	85.0177	3.82753	1.04387	4.40746	424.972	14.6142	72.0272	322.325	63.3283	11.9465	19.8336	0.695915	3.94352	23.4291	59.0368	9.51084	22.2693	57.645	12.0625	361.76
TlTt18	NL	18	3.94575	4.26568	0.479889	2.50609	0.586531	803.387	5.54538	393.935	0.319926	118.959	0.479889	1.49299	0.586531	3.35922	6.45184	7.14501	9.01124	14.9299	958.444	22.1282	0.053321	40.3107	8.10479	0.319926	0.479889	0.106642	32.6858	1.91955	4.95885	3.14594	283.668	4.90553	38.0712	171.32	43.0833	3.83911	3.67915	1.75959	14.3433	2.39944	21.435	2.50609	11.1441	20.5286	15.0365	146.526
TlTt20	NL	20	9.72222	11.9444	2.91667	0.138889	2.77778	1424.58	8.19444	775.417	11.3889	252.222	28.75	2.22222	0.972222	248.889	9.86111	16.5278	2.91667	24.8611	2090.97	40.4167	7.36111	35.2778	9.58333	4.58333	1.66667	3.61111	107.5	5.13889	3.88889	1.25	517.639	13.1944	93.75	418.472	85.9722	11.25	24.1667	2.36111	3.05556	31.5278	71.3889	9.58333	31.1111	79.1667	212.778	445
TlTt22	NL	22	6.4508	2.3076	1.7307	4.09075	0.209782	746.51	5.13966	367.853	1.88804	124.768	1.10136	0.576901	0.209782	3.5663	4.87744	11.3807	9.70243	14.2652	964.107	19.1426	1.36358	44.2641	12.2198	1.41603	1.41603	0.681792	53.5994	2.88451	7.34238	3.46141	283.678	4.92988	27.4815	135.31	32.1491	3.35652	3.04184	0.681792	15.5763	1.57337	21.7649	3.25162	11.1185	19.0377	14.3176	158.805
TlTt24	NL	24	5.46374	9.18373	6.62623	0.348749	2.09249	1723.63	10.23	880.243	10.5787	202.274	26.0399	2.55749	5.11499	164.028	12.4387	23.3662	5.57998	44.4074	1923.23	54.9861	8.02123	33.8287	6.16123	7.67248	6.85873	6.74248	127.061	6.85873	0.813748	3.71999	489.644	18.5999	260.283	833.859	221.456	1.51125	22.6687	4.88249	2.90624	41.6174	63.5886	2.09249	26.3887	181.466	92.3022	875.011

## Sheet: Table S3 (micromolC.L-1)
ID	Type	Time	TMTD	iso15:0	ante15:0	iso16:0	iso17:0	14:0	15:0	16:0	17:0	18:0	20:0	21:0	22:0	24:0	14:1n-5	15:1n-5	16:1n-9	16:1n-7	18:1n-9	18:1n-7	20:1n-9	22:1n-9	24:1n-9	16:2n-7	16:2n-6	16:2n-4	16:3n-6	16:3n-3	16:4n-3	16:4n-1	18:2n-6	18:3n-6	18:3n-3	18:4n-3	18:5n-3	20:2n-6	20:3n-6	20:3n-3	20:4n-6	20:4n-3	20:5n-3	22:2n-6	22:4n-6	22:5n-6	22:5n-3	22:6n-3
Tl1t0	PL	0	0.164657	0.80485	0.0921584	1.03457	0.103561	59.0182	1.67116	30.9811	0.147496	2.74035	0.0771896	0.191037	0.241088	1.05723	0.730993	0.241515	0.657326	3.13954	38.6507	3.64092	0.0647251	0.0360421	1.1423	0.305913	0.119842	0.141918	0.152536	0.133469	0.0448306	0.0288197	10.192	0.724001	10.54	29.5325	9.0716	0.661033	0.0884748	0.212995	0.0956313	0.0428692	1.51664	0.230648	0.46342	9.59383	1.47881	42.4289
Tl1t1/2	PL	0.5	0.18384	0.0532041	0.0709388	0.130036	0.0362346	46.4991	0.376866	25.5991	0.0679399	2.51026	0.162467	0.149543	0.197489	2.26743	0.640079	0.290477	0.384	2.23625	32.468	3.1704	0.0420373	0.18443	0.807601	0.0136552	0.232138	0.541656	0	0.00917301	0.00462164	0.00924329	8.18659	0.508473	8.23819	22.9653	7.14241	0.41828	0.165529	0.293223	0.299842	0.0095188	1.23576	0.504089	0.34164	7.70974	1.42289	34.1015
Tl1t1	PL	1	0.158483	0.441632	0.145311	0.267987	0.0378392	43.9312	0.81774	23.4705	0.0727677	2.03735	0.0954581	0.114121	0.247784	1.6618	0.595731	0.232621	0.420964	2.21806	26.8591	2.68501	0.0690376	0.0151951	1.06256	0.28666	0.0731277	0.0702025	0.0412644	0.0353695	0.0118801	0.080191	6.99978	0.554598	8.04017	22.6703	6.92447	0.61009	0.063825	0.182357	0.250802	0.0244685	1.19122	0.220039	0.401993	7.26233	1.17877	32.6173
Tl1t2	PL	2	0.168143	1.69228	0.175166	1.69948	0.203209	53.0463	2.04561	27.561	0.109187	2.76677	0.0124335	0.162725	0.248746	1.67749	0.647357	0.472814	0.620155	3.03727	34.6614	3.5034	0.0406603	0.0696667	0.83839	0.323085	0.432812	0.582163	0.125922	0.0429976	0.00309479	0.0340427	8.85121	0.699719	10.5489	29.3064	8.20989	1.14555	0.148846	0.285025	0.296394	0.00637407	1.62293	0.168776	0.550986	7.26598	1.47459	41.1297
Tl1t3	PL	3	0.237656	0.822479	0.160223	0.572547	0.152768	51.5407	1.3085	27.7955	0.0763839	2.54178	0.162157	0.24769	0.339849	0.669948	0.67532	0.409122	0.473447	2.87879	34.6154	3.55853	0.0112529	0.0170895	0.120884	0.323496	0.120626	0.0712787	0.0165746	0.0939228	0.0389704	0.0779407	8.58905	0.618122	10.4687	29.8536	8.36439	1.24549	0.421578	0.119637	0.372654	0.0974633	1.6386	0.286425	0.40574	5.2761	1.11935	38.7152
Tl1t4	PL	4	0.222095	0.485306	0.138272	0.463394	0.144024	58.0813	0.756434	30.8527	0.166182	3.1368	0.0936721	0.174319	0.250157	1.03191	0.591165	0.243214	0.696163	3.79854	40.4289	3.8324	0.0428433	0.054944	0.745159	0.398026	0.467611	0.723683	0.0757259	0.0645073	0.0113046	0.0508707	10.4627	0.810137	12.3232	35.8164	10.0281	1.56629	0.277636	0.167739	0.328874	0.0116416	1.93019	0.154126	0.535526	7.81908	1.29627	43.4985
Tl1t6	PL	6	0.199745	0.0450018	0.162507	0.0101139	0.140472	60.7792	0.487524	31.3329	0.0970534	2.94531	0.120406	0.105407	0.249239	1.22765	0.689507	0.249475	0.634315	3.3219	39.131	3.86871	0.0210706	0.00533324	1.18834	0.3773	0.449167	0.654501	0.106037	0.00775884	0.0364853	0.0364853	10.0086	0.736534	10.5535	31.7827	9.80743	0.784445	0.248018	0.221349	0.222753	0.0187864	1.75829	0.21721	0.558947	9.60912	1.31542	43.9354
Tl1t8	PL	8	0.217543	0.0921883	0.234661	0.121488	0.151254	69.5056	0.636944	36.9548	0.176939	3.1044	0.0818943	0.126614	0.213317	0.934476	0.806606	0.264682	0.822636	4.46048	48.2301	4.84763	0.0853471	0.181759	0.855119	0.456007	0.56499	0.785824	0.127155	0.0635774	0.0116481	0.00291202	12.3161	1.00523	14.1614	41.9924	11.5905	1.76787	0.289052	0.229454	0.446824	0.0209917	2.36306	0.227726	0.788282	10.6121	1.64976	64.442
Tl1t10	PL	10	0.173292	0.0771077	0.228467	0.0491003	0.157542	54.5027	0.499777	39.3323	0.189634	3.68913	0.113619	0.183619	0.363451	0.655238	0.656822	0.279216	0.768221	4.37656	53.6322	5.21056	0.00601718	0.109658	0.781834	0.454442	0.565854	0.756426	0.04136	0	0.0238153	0.0148846	14.1931	1.18088	16.7997	50.8616	7.44323	7.38951	0.362513	0.0213243	0.398534	0.0153282	3.09756	0.189917	0.948422	13.7883	1.92033	79.509
Tl1t12	PL	12	0.244669	0.397653	0.250271	0.483724	0.196014	66.4937	1.04002	37.3452	0.215899	2.94024	0.0902533	0.193448	0.330306	0.822865	0.852747	0.313921	0.770699	4.52789	47.7407	5.03899	0.0761675	0.174994	0.752295	0.433934	0.519579	0.76224	0.0862993	0.0575329	0.0289868	0.0376829	12.3817	0.950886	13.5787	41.965	11.5612	2.00443	0.281795	0.154246	0.468658	0.0328359	2.50845	0.152116	0.769581	11.6411	1.6938	72.2869
Tl1t14	PL	14	0.265973	0.0354599	0.298454	0.00597705	0.229424	81.2647	0.694429	45.3389	0.274705	3.04822	0.11447	0.115242	0.310257	0.880748	0.979719	0.274018	0.88522	5.42577	55.2182	5.76867	0.0311304	0.00630362	2.42693	0.588532	0.549094	1.05572	0.168127	0.0427959	0.0215619	0.0092408	14.5469	1.15969	16.8295	50.7082	13.2879	3.29209	0.36249	0.274231	0.634416	0.0158604	3.0806	0.177493	0.93645	15.8379	1.93861	81.8411
Tl1t16	PL	16	0.2261	0.919513	0.292081	0.0802309	0.243126	85.5551	0.555319	47.3472	0.582029	3.30546	0.147237	0.00380076	0.271523	5.83776	0.642647	0.559723	0.958973	6.27929	56.8509	5.7034	0.660991	0.326919	1.4147	0.592311	0.670052	1.11799	0.235005	0.179051	0.154111	0.0488645	14.7596	1.34307	18.1087	55.701	13.6953	4.39953	0.403877	0.257712	0.658044	0.116125	3.45146	0.379037	1.06055	15.426	5.46739	83.3355
Tl1t18	PL	18	0.248917	0.898369	0.387652	0.0186692	0.254581	75.5114	0.547641	37.637	0.260867	3.11597	0.0193267	0.223755	0.0130516	0.399125	0.585069	0.0434145	0.768044	4.98135	43.8884	5.19506	0.0745467	0.206736	0.838955	0.524315	0.960192	1.3708	0.0572879	0.101845	0.0224493	0.0320704	10.6801	0.82221	11.6016	35.4999	11.3304	0.587027	0.344591	0.393818	0.918132	0.211368	2.07732	0.217798	0.687837	8.52361	1.29634	56.2218
Tl1t20	PL	20	0.151364	1.00022	0.270133	0.0701456	0.208835	85.3497	0.565824	46.9644	0.83534	3.77845	0.14141	0.0423244	0.255517	6.31294	0.585158	0.562953	0.788551	5.42318	53.0063	5.5086	0.415335	0.101233	2.27415	0.558399	0.678323	0.90693	0.188814	0.16238	0.0951302	0.0456625	13.1222	1.06775	14.0727	41.9317	13.8371	1.06025	0.43612	0.52568	0.360514	0.105803	2.82759	0.20752	1.13307	18.4536	4.94513	79.9231
Tl1t22	PL	22	0.2776	1.07234	0.263511	0.114744	0.228069	97.8854	0.713683	53.6372	0.691684	3.67238	0.137944	0.0115728	0.329926	5.07753	0.8381	0.649253	1.09265	7.15264	57.2038	6.12298	0.339295	0.206893	3.15181	0.766495	0.804068	1.13096	0.280167	0.230948	0.0801158	0.0343354	14.2958	1.49409	21.0943	61.7069	18.0468	3.44503	0.370879	0.292799	0.911471	0.271084	3.87871	0.365079	1.21941	17.5704	4.38661	92.7559
Tl1t24	PL	24	0.456997	1.2305	0.309363	0.056247	0.36575	124.24	0.841197	64.6911	0.720848	3.6427	0.131013	0.0183189	0.261738	11.3293	1.10054	0.532545	1.37422	9.09544	64.6399	6.69195	0.637171	0.129763	6.26787	1.06699	1.07056	1.55588	0.373964	0.237323	0.0362335	0.0471036	16.2581	1.8652	26.6248	77.6901	22.3725	5.26531	0.519097	0.708196	1.37314	0.320896	4.89674	1.3944	1.30904	22.9672	9.2127	103.373
Tl2t0	PL	0	0.321281	0.517423	0.222568	0.0846508	0.266236	58.0714	0.532647	30.1742	0.19239	2.34362	0.00796656	0.30076	0.0100874	0.505801	0.750022	0.0709437	1.46149	8.15843	30.6942	4.1677	0.0440888	0.140001	1.2507	0.568306	0.456989	1.3905	0.181043	0.0885539	0.0396588	0.0198294	6.78248	0.502375	11.4866	33.2644	12.6943	0.498067	0.160305	0.304376	0.510511	0.214415	1.8023	0.397877	0.417037	4.8736	0.917824	34.3363
Tl2t1/2	PL	0.5	0.245244	0.0884401	0.174027	0.0375087	0.186525	54.4157	0.587704	33.8761	0.227327	3.01314	0.00896071	0.16238	0.214821	1.40395	0.724318	0.209916	1.9273	9.1947	36.0161	5.08973	0.0781429	0.12476	0.95015	0.380753	0.0907949	0.0527196	0.221344	0.0531224	0.0356863	0.041634	7.17275	0.471264	10.8271	30.679	9.70613	1.9929	0.36214	0.721237	0.343	0.0275625	1.87388	0.100981	0.569707	9.12151	1.25814	47.4446
Tl2t1	PL	1	0.327774	0.106122	0.146277	0.16244	0.278354	77.2063	1.001	43.0438	0.339885	3.1772	0.150144	0.142087	0.179468	1.50986	0.733904	0.237057	1.79733	10.182	45.2967	5.57835	0.238704	0.0795394	1.46531	0.659577	0.615409	1.07181	0.201759	0.0504396	0.0837135	0.0657749	9.80964	0.811773	16.6972	48.4009	17.2548	1.51712	0.189688	0.801583	0.563435	0.0431043	3.00868	0.18766	0.650575	10.7952	1.48403	56.7462
Tl2t2	PL	2	0.324243	1.518	0.111233	2.06792	0.47124	74.3653	2.99349	42.5926	0.304133	3.30573	0.0376773	0.131035	0.218587	1.76079	0.592824	0.392405	1.71009	9.59389	44.9376	5.46651	0.0999493	0.150046	1.2271	0.621351	0.567613	0.916913	0.162447	0.111682	0.0818459	0.00341024	9.65087	0.791695	16.4569	48.0817	17.1302	1.26925	0.373404	0.71191	0.477617	0.031607	3.0077	0.203525	0.660408	11.5278	1.62846	59.7123
Tl2t3	PL	3	0.31432	0.284682	0.151482	0.324893	0.280151	72.2796	0.958526	41.227	0.341518	3.13503	0.0437509	0.18169	0.252061	1.30488	0.722903	0.0394875	1.86818	9.92378	44.828	5.77899	0.0990524	0.114215	0.709383	0.608656	0.619381	0.981358	0.232354	0.110773	0.0571723	0.0245024	9.28475	0.794162	16.1086	48.2219	15.782	2.23419	0.289741	0.390035	0.55512	0.00841091	2.909	0.117658	0.634933	9.69333	1.59655	59.7487
Tl2t4	PL	4	0.371295	0	0.0359434	0.0311583	0.285882	79.9262	0.777925	45.299	0.346206	3.65056	0.0430076	0.11095	0.198767	2.95904	0.659496	0.31312	2.39626	12.6014	48.8492	5.9286	0.0838458	0.194426	2.72014	0.674751	0.711651	1.02267	0.28418	0.0557736	0.0642295	0.128459	10.1384	0.904926	17.8176	52.8562	17.8173	1.78257	0.295772	0.744907	0.573248	0.011024	3.26729	0.250594	0.752317	11.0308	1.88611	60.0585
Tl2t6	PL	6	0.375268	0.0954786	0.125858	0.0614487	0.290399	83.1282	0.831106	48.1187	0.392371	3.27116	0.0954193	0.205849	0.214026	2.79414	0.844757	0.262464	2.09609	11.1571	51.5324	6.36439	0.0822971	0.04629	2.95161	0.726246	0.623769	1.16288	0.321002	0.0785669	0.0452393	0.0723829	10.7346	0.986312	18.5162	54.0222	18.3328	1.0581	0.331003	0.682838	0.484512	0.0139763	3.28665	0.232751	0.76539	12.3552	2.32608	62.053
Tl2t8	PL	8	0.305414	2.40037	0.161893	2.12535	0.550225	72.9944	3.35309	50.6116	0.400742	5.18228	0.133642	0.164077	0.293863	6.97959	0.74084	0.589953	1.80503	9.42493	53.9506	6.30395	0.0196791	0.0298862	6.94275	0.636049	0.524181	0.907728	0.476655	0.0869574	0.0811329	0.0778876	11.3183	0.881159	16.4996	50.6315	17.9591	1.13196	0.40516	1.16234	0.187155	0.0133682	3.23894	0.297202	0.878505	19.0995	5.3764	80.1621
Tl2t10	PL	10	0.259068	0.218324	0.195036	0.229634	0.187348	54.5175	0.896592	46.124	0.576914	6.01248	0.131051	0.196369	0.336509	1.1298	0.556471	0.45772	1.77967	8.86577	57.5741	6.87914	0.0950671	0.229761	1.71936	0.445286	0.439309	0.818847	0.301133	0.0481812	0.045516	0.045516	12.3287	0.97703	18.4104	55.563	6.32298	11.7596	0.534085	0.400564	0.465601	0.00312484	3.84293	0.184217	1.08047	18.2299	1.95105	94.868
Tl2t12	PL	12	0.338001	0.154029	0.21506	0.161656	0.178135	86.3453	0.967779	50.4367	0.442368	3.2977	0.10041	0.171541	0.283561	0.881791	0.856488	0.0205051	2.33643	11.7148	57.4648	7.1152	0.097973	0.406072	0.971037	0.63849	0.683244	1.13377	0.309659	0.111237	0.0302943	0.00302943	12.2448	1.03047	17.7259	54.5606	16.7551	2.06403	0.446409	0.316206	0.592747	0	3.67024	0.187032	1.0377	15.5257	1.96054	90.0059
Tl2t14	PL	14	0.508194	0.251251	0.227034	0.223488	0.349444	121.255	1.38946	67.8086	0.466956	3.87844	0.101418	0.2393	0.272885	1.70388	1.07898	0.262399	3.01967	16.0392	71.5299	8.41653	0.114805	0.0710323	2.46986	1.13121	1.02866	1.84288	0.541743	0.244254	0.141995	0.0283991	16.0661	1.55746	27.5373	82.0481	23.7819	4.83566	0.69747	0.791111	1.24781	0.0389941	5.57578	0.211047	1.25499	18.9671	2.36924	99.1514
Tl2t16	PL	16	0.392079	0.918574	0.181619	0.0317909	0.242626	106.39	1.04083	60.77	0.767126	3.95088	0.138955	0.00736276	0.203729	12.245	1.08496	0.524541	2.30612	12.6873	57.494	6.87996	0.540884	0.171364	9.66718	0.87849	0.849805	1.29084	0.346855	0.205945	0.152912	0.0764558	12.6536	1.0657	18.7269	55.6833	19.16	1.5994	0.551394	1.44555	0.502402	0.221207	3.7883	0.483265	1.14475	23.6418	8.86424	88.3228
Tl2t18	PL	18	0.345832	0.960246	0.272876	0.248026	0.314049	117.405	1.04661	66.1287	0.536354	3.82629	0.144654	0.0254852	0.329694	6.04379	1.29996	0.557048	2.45664	14.1733	71.3529	8.39209	0.422109	0.364735	1.6567	1.05319	1.01418	1.57447	0.382331	0.314441	0.108017	0.0504079	16.4302	1.41736	23.3646	68.9309	23.2747	1.93324	0.784801	0.567415	0.622924	0.237305	4.93311	0.0926223	1.57447	21.9631	4.96574	122.323
Tl2t20	PL	20	0.257306	0.956016	0.277553	0.31969	0.299293	106.664	0.844232	65.5052	1.04359	3.95393	0.113007	0.0162527	0.318888	5.01332	1.25889	0.551743	2.21141	13.5592	71.5303	8.76571	0.763484	0.254923	1.50407	0.933981	0.926066	1.56323	0.454607	0.235279	0.07233	0.00401833	16.1694	1.45202	23.346	67.0617	18.6795	5.02203	0.773061	0.374194	0.897969	0.281391	4.92246	0.599541	1.7948	22.2097	4.20798	128.377
Tl2t22	PL	22	0.425633	1.1339	0.205216	0.00351771	0.518777	150.527	1.45739	83.5772	0.870551	4.6032	0.09104	0.0146646	0.247152	11.7543	1.74538	0.487313	2.32493	15.1157	70.1181	7.89836	0.648575	0.204045	12.825	1.26051	1.16052	1.90683	0.453364	0.34542	0.257424	0.15953	16.3486	1.75296	28.7902	78.9638	24.3982	5.1581	0.823671	2.19646	1.32175	0.373376	5.48609	1.27219	1.41936	34.4902	8.64913	112.766
Tl2t24	PL	24	0.479814	1.22712	0.278243	0.097408	0.57578	163.694	1.56959	92.9489	1.38479	5.63254	0.168064	0.0563992	0.355622	11.6496	1.85396	0.553714	2.48982	17.4797	91.4005	9.93672	0.199175	0.209265	10.8924	1.36234	1.23782	2.17535	0.136537	0.845051	0.100398	0.0780875	20.3193	2.01549	33.9593	89.4723	25.3725	6.12951	0.924651	1.38507	1.45513	0.111049	6.3548	0.478274	2.04801	36.5797	9.03395	142.289
TlTt0	PL	0	0.172885	0.361515	0.0924805	0.430805	0.10879	38.55	0.857555	19.4061	0.0601209	2.01374	0.117363	0.106339	0.216965	1.43019	0.426903	0.231625	0.271274	1.69904	26.0456	2.50421	0.389708	0.283964	0.866891	0.181255	0.0287706	0.535133	0.0898703	0.0434856	0.105165	0.0438188	6.32839	0.309601	5.9296	17.0604	4.52355	0.816926	0.131532	0.18833	0.165458	0.0360999	0.89312	0.141277	0.346727	6.32626	1.1747	32.7124
TlTt1/2	PL	0.5	0.17131	0.301958	0.0638285	0.0968294	0.0652055	46.3935	0.282321	22.3279	0.0877767	2.24175	0.0179917	0.0621019	0.0520717	0.210563	0.395966	0.00742331	0.542812	2.95171	27.7155	2.87397	0.0362075	0.10212	0.354562	0.350323	1.25007	1.16438	0.0355539	0.0304748	0.0230312	0.0537394	8.1398	0.599248	9.69904	28.5894	9.54385	0.0806708	0.285437	0.170215	0.590306	0.0658824	1.6231	0.231719	0.508886	4.58513	1.17643	39.139
TlTt1	PL	1	0.256677	2.12485	0.12395	2.62055	0.217069	46.0829	3.2847	22.7821	0.123609	2.12409	0.0957838	0.192859	0.169013	1.43017	0.381981	0.446193	0.433019	2.35456	28.1203	2.55137	0.0559626	0.0755461	1.11648	0.239352	0.296917	0.557477	0.436567	0.0824287	0.0184578	0.0799839	7.31499	0.515445	8.81534	25.5575	7.50912	0.5193	0.0787007	0.308507	0.177408	0	1.22746	0.139279	0.38755	7.51574	1.09853	33.9367
TlTt2	PL	2	0.199471	0.282463	0.0535705	0.0738798	0.00248756	53.2443	0.333602	24.4148	0.124378	2.63744	0.0764818	0.00513317	0.0645616	0.435985	0.419422	0.00490872	0.540889	3.30986	33.6974	3.39904	0.00769579	0.194791	0.868716	0.419977	1.10744	1.23993	0.00251896	0.0604551	0.0152296	0.0736095	9.61065	0.681494	9.92522	32.5678	10.3653	0.513653	0.381824	0.236367	0.595973	0.266619	1.58888	0.21678	0.465117	5.12207	1.24397	47.4172
TlTt3	PL	3	0.177311	0.0931416	0.0136973	0.080346	0.109144	53.3175	0.419141	27.1403	0.139928	2.33457	0.117593	0.0808491	0.229521	1.24239	0.480042	0.281644	0.494067	2.67971	33.5661	3.20989	0.0115439	0.0905796	1.2283	0.29249	0.0224992	0.959029	0.0991861	0.0453422	0.0171336	0.042834	8.47056	0.544758	8.81413	25.6279	7.06684	1.1267	0.064288	0.280529	0.24702	0.00882215	1.31401	0.214499	0.53516	9.7217	1.26493	40.4806
TlTt4	PL	4	0.208921	0.112681	0.0912176	0.0298465	0.104149	61.6411	0.437312	30.0446	0.148001	2.51907	0.109546	0.192292	0.179255	1.11317	0.464784	0.270418	0.647882	3.92833	42.7852	3.66148	0.0508746	0.128771	0.934004	0.476495	0.487512	0.834555	0.0943619	0.0943619	0.0139831	0.17339	11.172	0.804493	12.4908	38.7364	10.0979	2.22961	0.291905	0.234669	0.403196	0.0143999	2.02885	0.129494	0.631838	7.32443	1.51994	42.4488
TlTt6	PL	6	0.263665	0.0349735	0.117638	0.057879	0.152656	70.5162	0.616812	33.3704	0.155904	4.1332	0.153122	0.184316	0.266382	1.44873	0.402024	0.301238	0.719197	4.2245	46.5132	3.41852	0.0468925	0.037303	2.14863	0.48961	0.00326407	1.37091	0.141427	0.115115	0.0231994	0.0563415	12.0968	0.819578	12.8289	40.2702	12.8827	0.539238	0.322191	0.474807	0.221844	0.0477819	2.0643	0.330793	0.593501	9.53379	1.45766	29.436
TlTt8	PL	8	0.220104	0.174724	0.141005	0.195308	0.0626293	72.5017	0.729557	38.2741	0.15031	3.03628	0.0256745	0.158317	0.305588	0.765747	0.546302	0.274981	0.737119	4.68511	51.032	4.81017	0.04521	0.0032695	0.601306	0.494072	0.54757	0.934645	0.152208	0.0729329	0.0287576	0.00639058	13.5718	0.935305	14.6843	43.1901	12.1294	1.26073	0.343328	0.120982	0.388283	0.0263242	2.50683	0.20056	0.868289	11.9857	1.92066	71.2761
TlTt10	PL	10	0.192414	0.0332198	0.141939	0.070248	0.188193	64.2161	0.604003	44.6624	0.327024	3.72416	0.101179	0.190989	0.37153	0.874218	0.562274	0.283089	0.827761	4.91429	56.3982	5.159	0.12726	0.0837495	1.64703	0.523967	0.582874	1.04483	0.159328	0.149956	0.0283322	0.0409242	15.7663	1.14707	17.3458	50.4285	9.19201	6.03754	0.244828	0.293149	0.259348	0.00324185	2.94934	0.233225	0.970158	16.7895	2.01422	77.8051
TlTt12	PL	12	0.316301	0.0565943	0.116167	0.0843487	0.170403	94.4969	0.789349	49.7296	0.206918	3.34148	0.0218298	0.232329	0.37908	3.33085	0.670238	0.22217	1.06531	6.36759	59.8553	5.76848	0.0658972	0.136613	6.1159	0.678867	0.86846	1.16508	0.212611	0.150985	0.0589936	0.0527838	17.0756	1.36015	19.8256	56.7946	14.6082	2.96482	0.339973	0.362215	0.649087	0.236613	3.32086	0.338659	1.09912	17.4734	3.12791	86.7938
TlTt14	PL	14	0.2834	0.0125944	0.141687	0.0127373	0.167259	87.3415	0.71159	47.8892	0.199425	3.37712	0.145045	0.272135	0.427423	0.661645	0.733559	0.225326	1.14855	6.87528	62.4502	6.01592	0.026536	0.110824	2.00224	0.704671	0.905082	1.35762	0.104228	0.198685	0.0196925	0.0787701	17.7505	1.48413	21.0495	60.5855	14.0578	3.89161	0.376164	0.302275	0.760481	0.0506987	3.90831	0.253289	1.14816	15.4767	2.45744	87.4315
TlTt16	PL	16	0.251594	0.685035	0.169456	0.0437564	0.254143	87.5193	0.587694	46.5569	0.559851	3.3346	0.177415	0	0.21413	6.66807	0.638971	0.563282	1.14253	6.70461	58.6581	5.65773	0.543155	0.223045	1.74483	0.684768	0.74029	1.39545	0.00745946	0.0522162	0.0901993	0.0338247	16.4153	1.46807	19.2063	57.126	11.6587	5.38498	0.446128	0.346134	0.719881	0.274793	3.50163	0.0541408	1.31084	17.2304	5.45879	88.0194
TlTt18	PL	18	0.350373	0.703723	0.176833	0.197089	0.147468	81.6189	0.505242	42.3851	0.56775	3.31658	0.143577	0.00380381	0.294706	6.00883	0.445544	0.563811	0.853106	4.93849	51.1437	5.14992	0.30795	0.331032	3.4268	0.426066	0.655772	0.837313	0.0559985	0.0298659	0.067713	0.0338565	13.757	0.937867	12.3176	37.3245	10.3991	1.37716	0.342609	0.554334	0.499741	0.247933	2.17547	0.723846	0.892993	19.622	4.61301	79.9988
TlTt20	PL	20	0.302147	0.870147	0.212869	0.222838	0.263242	104.049	0.709569	53.8967	0.614232	3.97056	0.152488	0	0.320813	5.15708	0.758523	0.568393	1.31282	7.92642	70.4131	7.08507	0.499654	0.175264	1.03447	0.805135	1.00067	1.46074	0.042496	0.0502225	0.0661787	0.00389287	19.5787	1.67388	21.1749	64.1764	16.6101	3.00464	0.474052	0.179263	0.685522	0.340756	4.05466	0.408578	1.37399	18.9969	5.16096	113.141
TlTt22	PL	22	0.23083	0.82965	0.217375	0.0109921	0.281282	109.796	0.735461	55.7887	0.736516	4.16191	0.204827	0.0152747	0.265118	6.09832	0.685353	0.51854	1.22559	7.11364	61.9767	6.19651	0.583955	0.340052	3.58857	0.740159	0.859179	1.26459	0.0374781	0.0412259	0.0302122	0.101966	17.0514	1.46375	19.3071	57.3337	15.0894	3.12606	0.440561	0.90431	0.843931	0.178898	3.33465	0.792733	1.10094	23.8313	5.46942	97.6192
TlTt24	PL	24	0.298956	0.724598	0.205483	0.0255212	0.261475	112.32	0.78589	58.2503	0.835982	4.46244	0.166069	0.915737	0.42438	11.2704	0.890132	0.537772	1.54276	9.55416	70.1288	6.39029	0.626634	0.326832	6.49268	0.829014	0.988155	1.88379	0.0149169	0.04848	0.0901872	0.105218	19.0237	1.62718	20.7247	60.5672	16.3492	3.47741	0.519131	1.46126	0.936494	0.243798	4.52542	0.552936	1.25198	22.9813	8.88557	92.7694
Tl1t0	NL	0	0.135911	0.0928502	0.0586422	0.1285	0.00499228	41.1747	0.317648	22.747	0.14228	9.1827	0.0153491	0.0824141	0.0362792	0.060253	0.287067	0.300465	0.358517	0.632388	54.3418	1.14876	0.0360376	2.22828	0.379235	0.0100339	0.0476612	0.0401358	1.49384	0.0631913	0.224137	0.185932	17.868	0.205668	1.44482	6.72293	1.78043	0.240877	0.23197	0.140746	0.834093	0.13377	1.25913	0.086487	0.68152	1.55232	0.965535	10.4364
Tl1t1/2	NL	0.5	0	0.083818	0.0397032	0.102615	0.0495731	41.7581	0.255868	22.3568	0.0923862	8.57126	0.00461867	0.0278989	0.0350894	0.189189	0.261338	0.233441	0.242731	0.723703	54.117	1.27051	0.0511216	2.21855	0.168794	0.0158513	0.0158513	0.0430249	1.27095	0.136906	0.174743	0.241421	16.7406	0.21351	1.54795	6.34704	1.74842	0.233812	0.228227	0.195287	0.71507	0.00947113	1.02465	0.0851713	0.548195	1.8612	0.948658	10.4505
Tl1t1	NL	1	0.0187158	0.0740247	0	0.0140372	0.0189054	43.8259	0.157304	24.5323	0.193781	10.852	0.0096877	0.0292591	2.62017	0.128968	0.0967337	0.205185	0.084855	0.659988	82.7083	1.43569	0.813958	0.833965	1.09206	0.0237487	0.0284984	0.00474974	2.62753	0.119651	0.00964538	0.00964538	22.2246	0.00486782	1.43601	6.48002	0.937809	0.990654	0.222081	0.0246757	0.908858	0.124161	1.8793	3.5531	0.753172	1.10602	0.914104	11.5873
Tl1t2	NL	2	0.137383	0.0866593	0.0117107	0.0947491	0.00957069	30.4237	0.206111	16.7635	0.112456	7.58581	0.0269737	0.125903	0.0347754	0.193355	0.200546	0.269125	0.231491	0.474917	40.2125	0.889663	0.118436	1.65377	0.439247	0.00240451	0.00480901	0.0480901	1.32289	0.0678406	0.197757	0.258793	12.0611	0.150321	1.01529	4.85119	1.21188	0.148963	0.13741	0.0499673	0.497814	0.0301705	0.733776	0.105512	0.401621	0.874379	0.55224	5.85312
Tl1t3	NL	3	0.142678	0.276935	0.00522518	0.110974	0.0106758	48.9446	0.355316	25.4078	0.0854065	10.9516	1.00112	0.0495674	0.8534	0.0280106	0.0104048	0.163267	0.138428	0.798626	88.0034	1.52926	0.148626	0.663212	0.242168	0.00536431	0.0160929	0.0321859	3.43777	0.113511	0.119828	0.0544671	23.4895	0.302372	1.68778	8.10457	1.14835	0.32125	0.273111	0.0334422	1.13303	1.76124	2.97484	0.336272	1.03776	4.01545	5.46991	16.6208
Tl1t4	NL	4	0.283917	0.19114	0	0.00604091	0.0305099	50.9435	0.400203	27.3049	0.225773	12.0641	1.03185	0.440708	0.810852	0.256161	0.0237883	0.252863	0.133897	0.870338	90.477	1.51259	0.213948	0.0955644	5.15679	0	0.00613216	0.183965	4.14612	0.179191	0.018679	0.0498108	24.0306	0.289092	1.94823	8.76473	1.09606	0.544519	0.229375	0.0892013	1.09644	1.73122	3.00058	0.506134	0.998316	2.26903	6.41588	32.7071
Tl1t6	NL	6	0.136768	0.207684	0.0627883	0.00976938	0.0246703	49.6958	0.342924	27.2468	0.162824	11.0742	0.975948	0.325813	0.763225	0.227845	0.0961761	0.150915	0.132876	0.905533	83.3255	1.60906	0.208616	0.103031	0.156172	0.00991695	0.119003	0.0247924	3.42251	0.149891	0.0503464	0.0302078	21.9749	0.513256	2.31728	8.68371	1.11815	0.261107	0.170017	0.0206081	1.01102	1.67984	2.84892	0.445524	0.969736	3.7802	1.32861	22.7401
Tl1t8	NL	8	0.267551	0.138576	0.113381	0.0382225	0.0257392	39.2188	0.302351	23.1118	0.141566	11.0165	0.830941	0.132785	1.12229	0.148573	0.0627144	0.926945	0.0385093	0.0128365	32.8696	6.86414	0.0530866	0.134369	0.29872	0.0905329	0	0.439731	0.586444	0.0651605	0.249507	0.118187	2.59337	0.0132548	0.198822	1.26796	0.28224	0.307141	0.0403143	0.0403143	0.0540934	0.28399	3.0894	0.594547	0.287119	2.92911	5.07437	2.33768
Tl1t10	NL	10	0.168748	0.397006	0.149597	0.110561	0.0117557	48.862	0.333719	26.011	0.146946	11.594	1.1566	0.0606458	0.939723	0.265258	0.246331	0.28997	0.117254	0.92631	89.2377	1.40926	0.127291	0.177971	0.0868206	0.0118138	0.0295346	0.0354415	4.67236	0.26189	0.119953	0.0239906	22.3001	0.411656	1.76165	8.55251	1.04352	0.329348	0.165712	0.0859248	1.22911	1.68616	3.139	0.401143	1.11776	1.9533	1.28126	17.6576
Tl1t12	NL	12	0.159157	0.275406	0.0168616	0.147792	0.0172253	51.3104	0.618264	29.4618	0.269864	13.5459	1.09452	0.29621	1.07295	0.451949	0.190264	0.232271	0.32071	0.950684	89.7503	1.53414	0.213161	0.0839284	0.109043	0.0519316	0.0980931	0.0577018	4.06999	0.127914	0.0585881	0.0175764	21.9543	0.514486	2.33588	12.7253	1.81687	0.268104	0.0899312	0.0599541	1.13429	1.55059	3.291	0.331571	1.19558	2.26393	1.59518	19.3286
Tl1t14	NL	14	0.22859	0.457855	0.0695476	0.211011	0	56.0105	0.567978	32.3609	0.26051	14.3008	1.24391	0.29933	1.26004	0.14913	0.415466	0.286241	0.401567	1.03936	97.8878	1.61201	0.305281	0	1.34928	0.0535496	0.0356997	0.113049	4.68842	0.185858	0.0302067	0.0543721	23.3529	0.469536	2.53062	13.9569	2.02187	0.485335	0.296746	0.030911	1.27539	1.62379	3.5125	0.298387	0.987523	2.74569	2.75201	26.1098
Tl1t16	NL	16	0.44961	0.501939	0.150582	0.0507635	0.168481	58.6923	0.34419	33.0688	0.651947	14.0455	1.37384	0.0529058	0.00760472	2.66768	0.335546	0.874526	0.131514	1.01559	101.166	1.7414	0.400366	1.36902	0.0618285	0.14723	0.00736148	0.220844	5.2295	0.192861	0.373728	0.0373728	23.0259	0.686549	3.45538	17.2983	3.12881	0.653679	1.26206	0.0841371	0.0153947	1.4394	3.95845	1.4767	1.53308	4.0702	0.297438	24.6511
Tl1t18	NL	18	0.284826	0.689267	0.0444689	0.0899472	0.128713	62.1499	0.437281	36.1663	0.726852	14.917	1.30361	0.0468715	1.48558	12.4278	0.302545	0.575216	0.166141	1.07992	102.526	1.76915	0.351355	0.0948615	0.207694	0.167394	0.0228265	0.266309	5.20586	0.25301	0.169965	0.0927083	23.2188	0.92796	4.18752	20.0781	4.0958	0.612792	1.13053	0.142305	0.0159119	1.44799	3.83524	0.70751	1.00545	5.6794	7.07902	26.7815
Tl1t20	NL	20	0.55754	0.630052	0.102383	0.0876153	0.0241367	72.3175	0.401662	41.3544	0.876965	14.3834	1.40999	0.0747104	1.58698	4.04458	0.446954	0.777942	0.208645	1.57287	113.157	2.09246	0.315281	0.865222	0.161282	0.299158	0.0485121	0.388097	5.71928	0.244414	0.328381	0.131353	25.2819	0.828635	5.65958	25.349	5.62103	0.125225	1.35255	0.361241	0.00845424	1.45413	4.16051	0.22808	1.84623	7.64272	0.0429849	34.6244
Tl1t22	NL	22	0.342888	0.591671	0.039888	0.107575	0.0339571	50.0829	0.232682	26.8534	0.475399	10.6918	1.13452	0.161165	1.31845	3.04348	0.251522	0.757189	0.067739	1.02287	88.5356	1.24882	0.343175	0.00709079	0.0788188	0.129675	0	0.1638	5.96249	0.220069	0.138597	0.173246	19.2986	0.566569	2.63699	14.0444	2.20574	0.007047	0.971524	0.269474	0.035682	1.19178	3.21751	0.420707	0.786436	2.67779	0.137881	17.8472
Tl1t24	NL	24	0.156413	0.0515538	0.0343692	0.0521389	0.0351107	54.6009	0.498358	30.6924	0.965543	12.449	0.125942	0.0362261	0.528528	11.7363	0.222425	0.467669	0.01751	0.542815	39.344	3.72749	1.82848	0	0.48157	0.0882108	0.299917	0.564549	2.78871	0.391093	0.28661	0.0537394	1.83165	0.072323	1.71036	3.13152	1.54001	0.054648	0.256631	0.109985	0.700989	0.368942	3.93574	0.0535463	0.518095	6.94067	0.56538	11.2883
Tl2t0	NL	0	0.261691	0.314209	0.0813247	0.0934633	0.0132171	23.6783	0.22919	13.5858	0.16427	5.10016	0.0290265	0.00194815	0.0156816	0.188254	0.187703	0.706064	0.559338	1.04712	29.3241	0.759619	0.0194715	0	0.201204	0.03795	0.0474375	0.0740026	2.84123	0.078392	0.579921	0.500928	7.92067	0.190578	1.48573	7.94638	2.59495	0.117553	0.120266	0.0611186	0.402767	0.0773789	0.634963	0.17644	0.284842	2.12854	0.490271	11.2227
Tl2t1/2	NL	0.5	0.144034	0.162767	0.0632982	0.125747	0.00461884	16.9615	0.205721	10.0963	0.0785203	4.8415	0.0686381	0.0142967	0.0503481	0.0193899	0.157555	0.252925	0.357037	0.483731	23.0843	0.415277	0.00952625	1.15739	0.165687	0.0208876	0.0162459	0.0162459	2.03456	0.0678187	0.518428	0.0919032	6.21995	0.116549	0.756376	2.08133	1.18901	0.122213	0.0482287	0.0795774	0.373716	0.0873623	0.429831	0.10669	0.294416	1.24126	0.347947	6.83098
Tl2t1	NL	1	0.227529	0.273688	0.0255133	0.112594	0.0473885	17.2442	0.204108	10.4783	0.0568662	4.36371	0.0437099	0.0342258	0.00491965	0.0671411	0.180123	0.448859	0.465573	0.600286	21.1783	0.500689	0.0415385	1.12314	0.21749	0.00476229	0.033336	0.0476229	2.06103	0.0791781	0.500468	0.287709	5.60355	0.126898	1.21529	6.15558	1.7519	0.0614649	0.0940154	0.106386	0.313713	0.0846526	0.440999	0.0920476	0.186274	1.46339	0.288628	7.4083
Tl2t2	NL	2	0.244331	0.307715	0.0661206	0.126026	0.0285776	21.1196	0.233967	12.5898	0.109114	5.61036	0	0.0187635	0.0296679	0.24539	0.189901	0.694653	0.549348	0.583038	28.6211	0.501474	0.0348285	1.59223	0.334403	0.00522163	0.00783244	0.0574379	2.13618	0.0868151	0.572598	0.617663	7.33989	0.120407	1.02213	5.99489	1.60345	0.107829	0.0515418	0.157338	0.360351	0.0272993	0.516503	0.150025	0.41124	1.80442	0.399748	8.43838
Tl2t3	NL	3	0.170564	0.157772	0.0217617	0.0770305	0.027789	19.2466	0.190417	12.2533	0.144503	6.05849	0.677819	0.0344062	0.582754	0.594956	0.178751	0.257731	0.116413	0.659676	49.14	0.558984	0.131823	0.29014	0.0410466	0.039097	0.00558529	0.0502676	5.22275	0.123815	0.136106	0.0510397	8.8687	0.0286207	1.03607	6.15591	0.847403	0.103805	0.0116066	0.0174099	0.449689	0.794255	1.71032	0.309276	0.247987	1.82319	0.872993	14.3665
Tl2t4	NL	4	0.246744	0.0914928	0.0563032	0.163709	0.0311555	17.377	0.194717	10.8404	0.0958632	4.29272	0.00736847	0.00989087	0.0124401	0.0150912	0.196202	0.477649	0.36095	0.686049	18.9521	0.530774	0.0123572	0.930828	0.156769	0.0602108	0.0987458	0.0361265	2.6768	0.0169878	0.376596	0.068472	4.94214	0.0987324	1.67598	7.97838	2.07732	0.0373016	0.0350342	0.0475464	0.26946	0.0302198	0.428312	0.158526	0.236783	1.59284	0.33547	8.16035
Tl2t6	NL	6	0.370165	0.392163	0.0305015	0.220341	0.00890274	23.0559	0.25273	14.0842	0.102381	5.82286	0.894156	0.0826701	0.80871	0.238257	0.373099	0.650011	0.270833	0.865784	47.9406	0.68286	0.0367234	0.0278855	0.173769	0.00894677	0.0268403	0.165515	6.29256	0.14875	0.331573	0.0408789	9.09294	0.311753	1.5175	7.71415	1.36671	0.0646644	0.079016	0.041832	0.439683	0.790494	1.91589	0.238359	0.411424	2.57325	1.03215	18.9796
Tl2t8	NL	8	0.234576	0.732468	0.0488312	0.0308659	0.0249423	21.1116	0.415069	15.3157	0.074827	7.03345	0.875511	0.0450358	0.666769	0.346844	0.249168	1.27969	0.149268	0.827199	53.2006	0.323079	0.160759	0.0325523	0.131578	0	0.0125329	0.043865	5.70813	0.101029	0.197243	0.0509014	8.57253	0.0770666	1.19453	6.0724	0.605612	0.0905835	0.0846434	0.0260441	0.425901	0.773175	2.00462	0.314258	0.298103	2.32538	0.546363	13.1428
Tl2t10	NL	10	0.293469	0.910375	0.0227594	0.161124	0.0116252	20.4267	0.256046	13.9315	0.0465008	6.8965	0.935263	0.143934	0.748261	0.317216	0.141626	0.367042	0.214511	0.724705	49.1194	0.726335	0.0779242	0.121377	0.0981221	0.0292067	0.0116827	0.0116827	5.89775	0.0941757	0.266898	0.0652418	7.98508	0.20953	1.20929	6.11863	0.637373	0.126658	0.0910404	0.0182081	0.323716	0.830668	2.08993	0.323455	0.314932	1.8074	0.739108	12.751
Tl2t12	NL	12	0.3374	0.409709	0.0702359	0.136147	0.0478341	27.7623	0.438979	17.8707	0.125565	6.97761	1.07851	0.259107	0.788338	0.426715	0.291373	1.42767	0.220662	0.942293	58.3153	0.965842	0.197313	0.280928	5.02154	0.072106	0.0240353	0.15623	5.92154	0.0302737	0.158629	0.0305057	9.66357	0.166272	2.24159	12.03	2.17925	0.198537	0.156085	0.0624339	0.578035	1.06811	2.35851	0.282506	0.52088	3.75678	3.52677	31.0596
Tl2t14	NL	14	0.672866	0.885227	0.0338303	0.347845	0.0288001	40.3893	0.43416	25.0106	0.259201	8.2221	1.30461	0.160462	1.01656	0.314347	0.583835	1.92091	0.33322	1.59142	65.7389	1.47464	0.0950393	0.0120279	0.200547	0.0347311	0.0520967	0.0289426	8.14834	0.163317	0.282117	0.0528969	11.6719	0.397472	4.65102	19.4145	4.79421	0.14942	0.0962315	0.0360868	0.568946	0.859471	2.41823	0.205623	0.452827	7.06573	1.07094	31.8214
Tl2t16	NL	16	0.292721	0.550646	0.0282383	0.0285588	0.0865424	35.3325	0.261207	21.7832	0.389441	6.58717	1.06433	0	0.329429	19.6109	0.196806	1.24523	0.201411	1.27322	63.4423	1.25287	0.349546	1.00899	0.14457	0.094218	0.0507328	0.123208	6.32433	0.197179	0.117742	0.183972	10.7409	0.349103	3.60244	16.2377	3.71304	0.0598662	0.632557	0.0301218	0.166721	0.522896	2.53202	0.719348	0.482686	7.29774	1.25611	32.4241
Tl2t18	NL	18	0.0470321	0.0310035	0.139516	0.0156777	0.190034	29.5708	0.263533	19.9577	0.475086	7.26857	1.15232	0.0980359	0.263046	20.0272	0.123473	0.437496	0.0631814	0.379091	21.9768	2.3489	0.0653236	0.148809	0.985779	0.0477436	0.0477436	0.318291	2.68947	0.320723	0.484769	0.226226	6.86248	0.0815509	2.33512	3.28473	3.42663	0.0492965	0.0826787	0.264572	0.0166406	0.948516	1.77517	0.198129	0.38695	5.65182	0.397256	14.7484
Tl2t20	NL	20	0.505789	0.897281	0.0735476	0.0297529	0.0225403	35.7497	0.205935	22.3817	0.435779	7.56956	1.23203	0.0465128	0.0156002	11.7255	0.241649	1.14163	0.142387	1.19906	64.7288	1.04573	0.294429	1.05118	0.642096	0.0528542	0.0075506	0.143461	6.35292	0.106516	0.0613326	0.137998	10.9518	0.45656	3.50545	16.0128	3.65644	0	0.596245	0	0.086846	1.09742	2.58228	0.410213	1.11749	6.6154	12.0827	25.9386
Tl2t22	NL	22	0.794004	1.09355	0.084119	0.00708948	0.0143223	33.1668	0.17525	19.1416	0.658826	7.34612	1.32839	0.0812752	0.0892124	14.3097	0.167504	1.58269	0.0571414	0.914269	68.9982	0.632941	0.450476	1.23368	1.1862	0.122342	0.100752	0.00719657	8.44081	0.108773	0.168063	0.204599	11.3979	0.236015	1.45297	10.6129	0.979689	0	0.650541	0.0299099	0.0526744	1.06101	2.80199	0.601507	1.16399	4.26215	9.88634	21.5897
Tl2t24	NL	24	0.49642	0.829156	0.145931	0.120754	0	51.6288	0.378099	29.4504	0.643753	8.4754	1.50008	0.139833	0.00703488	3.03672	0.435885	1.59125	0.168972	1.67621	86.6457	1.20475	0.552054	1.71216	0.26453	0.143007	0.0953381	0.299634	8.32348	0.446023	0.20052	0.117546	13.9739	0.558333	3.5175	15.9951	2.96513	0.0421882	0.757098	0.162741	0.24922	0.904311	3.54718	0.184985	1.92213	3.99692	0.398244	21.595
TlTt0	NL	0	0.0606791	0.0249998	0.0249998	0.0910206	0.0664017	35.4384	0.26	18.5126	0.0970486	7.66622	0.0157044	0.0105402	0.0106054	0.187623	0.236462	0.183947	0.170671	0.588435	49.305	0.962589	0.0158021	1.89321	0.555072	0.0230989	0.0590305	0.0359316	0.711192	0.1681	0.205871	0.14854	15.4758	0.147299	0.912731	3.28697	1.12285	0.259702	0.264006	0.13867	0.61187	0.0509891	0.974978	0.0750812	0.537214	0.968778	1.09431	7.05731
TlTt1/2	NL	0.5	0.436523	0.196774	0.234859	0.622701	0.0778139	56.3618	0.241209	28.2847	0.213988	10.536	0.159496	0.0334525	2.49753	0.0612492	0.631987	0.377479	0.420405	0.931364	96.8536	1.85116	0.902752	0.981699	0.0889398	0.0521325	0.0521325	0.0716822	4.2747	0.0787963	0.330833	0.0132333	25.0196	0.454143	2.10375	8.39956	0.954837	1.50719	0.467194	0.243754	0.906246	0.0136278	2.31779	5.29011	0.799117	3.03487	1.21949	19.5288
TlTt1	NL	1	0.104957	0.116137	0.0247099	0.10496	0.0201944	30.7336	0.249573	17.5407	0.103496	7.75692	0.051741	0.0130225	0.0550328	0.0715297	0.221419	0.276458	0.279475	0.458241	41.8785	0.933477	0.0728883	1.65778	0.311604	0.0152207	0.0532725	0.0126839	1.07359	0.0920221	0.22409	0.231818	13.192	0.148192	0.889149	2.91114	1.18365	0.209544	0.184506	0.158148	0.538463	0.116711	0.856896	0.106015	0.512213	1.24616	0.779524	8.16928
TlTt2	NL	2	0.157022	0.0834251	0.0139042	0.103121	0.0118368	41.7686	0.261865	21.1469	0.00236736	8.25258	0.0169834	0.0317534	0.068815	0.183856	0.276871	0.45781	0.328214	0.642265	54.3521	1.07506	0.0537088	2.14298	0.671882	0.0214116	0.0404441	0.0190325	1.89143	0.110273	0.246392	0.181171	16.9558	0.214563	1.64092	7.53001	1.89624	0.3046	0.264497	0.145844	0.716432	0.10448	1.21169	0.144165	0.603603	1.07509	0.968842	8.63844
TlTt3	NL	3	0.049188	0.139831	0.048637	0.0245945	0.0621079	48.3883	0.218869	24.7544	0.167691	9.66372	0.840204	0.0320405	0.85755	0.117328	0.145275	0.784372	0.185843	0.792936	91.0367	1.45754	0.16012	0.00648457	0.471798	0.0436906	0.0561736	0.0312075	3.21378	0.106916	0.133085	0.0316869	23.1631	0.364611	1.72071	7.92908	1.05723	0.012889	0.110247	0.00648514	0.933257	1.50757	2.66001	0.554286	1.0623	1.95112	2.1104	23.8379
TlTt4	NL	4	0.147049	0.164471	0.0429054	0.137409	0.00243506	38.5032	0.22168	20.1461	0.121753	6.3371	0.00748677	0.030149	0.0429753	0.168669	0.268176	0.321943	0.296311	0.638773	44.3462	1.18744	0.0527336	1.5712	0.691096	0.0220239	0.0416007	0.0562834	1.53126	0.145482	0.2435	0.193806	13.8415	0.235746	2.63584	9.48534	2.42346	0.224876	0.233921	0.124589	0.665275	0.0844388	1.01716	0.132948	0.597583	3.69738	0.91849	18.106
TlTt6	NL	6	0.370205	0.195396	0.00742011	0.187608	0.027794	70.4228	0.405636	35.7206	0.186978	9.46629	0.00258954	0.005214	0.0104925	0.28109	0.465428	0.53849	0.625012	1.37604	70.7767	2.75692	0.0495075	2.52203	0.263919	0.182824	0.0330099	0.292011	2.98336	0.117697	0.435721	0.244932	22.137	0.569915	8.27548	23.7413	6.86594	0.332971	0.440603	0.14247	0.995654	0.140719	1.93722	0.270599	1.02273	8.9691	1.63884	47.7511
TlTt8	NL	8	0.0637898	0.0630753	0.0189226	0.0382747	0.00644361	53.5216	0.403686	28.0362	0.0773233	12.4142	0.970757	0.292526	1.08369	0.060863	0.276321	0.146225	0.199237	0.983335	99.8434	1.6431	0.0531591	0.0269106	0.278734	0.012951	0	0.00647548	4.11072	0.143549	0.138074	0.111774	25.1453	0.418097	1.58611	8.19958	0.915171	0.260758	0.026913	0.026913	1.12397	1.71304	2.90964	0.432989	1.17743	1.57672	1.45279	17.5773
TlTt10	NL	10	0.246516	0.0874338	0.0264951	0.267958	0.00270667	43.9046	0.275552	22.2512	0.175934	8.81115	0.0748968	0.0195486	0.0955378	0.0795381	0.284899	0.480699	0.515641	0.731621	57.5503	1.21815	0.0697805	2.31731	0.0399797	0.00816017	0.0788817	0.127843	2.12141	0.137042	0.359039	0.30104	17.6142	0.278768	1.77018	8.36507	2.23021	0.233108	0.254361	0.0678296	0.901598	0.0938572	1.31666	0.161986	0.762005	1.19158	1.02962	9.58567
TlTt12	NL	12	0.176382	0.500715	0.101268	0.119487	0.0114948	63.8422	0.416329	32.1307	0.298864	12.2533	1.32531	0.11267	1.33056	0.0301593	0.392103	0.243839	0.217837	1.24397	104.044	1.89764	0.0296346	0.174021	0.309255	0.0693097	0.0173274	0.0115516	5.35435	0.168778	0.0821034	0.164207	26.8905	0.337406	3.08993	15.5213	2.58091	0.310111	0.348073	0.0120025	1.32865	1.92655	3.5981	0.283619	1.05021	2.22315	1.34495	18.5382
TlTt14	NL	14	0.114251	0.241347	0.128376	0.24928	0.0209833	62.5349	0.385132	31.2638	0.220325	10.8349	1.18277	0.319337	1.31792	0.209209	0.32721	0.65733	0.177898	1.19297	94.2876	1.9772	0.221798	0	0.0608813	0.0316307	0.110707	0.163425	4.86584	0.169986	0.0749385	0.064233	24.1307	0.28635	4.42492	19.0143	3.87866	0.386471	0.262923	0.0657307	1.19066	1.7915	3.24528	0.275392	1.01429	4.31614	1.34529	23.8781
TlTt16	NL	16	0.555847	0.325701	0.189992	0	0.0623865	64.0822	0.420702	33.9143	0.693183	11.9151	1.40662	0.100129	1.56879	5.91453	0.418863	0.724969	0.324956	1.03019	104.239	1.95774	0.507534	0.123036	0.402242	0.174153	0.0417967	0.0835934	5.14518	0.231638	0.0636581	0.268778	25.9798	0.899552	4.43351	19.9781	3.95253	0.740848	1.2377	0.0434282	0.247654	1.47136	3.73119	0.596801	1.41392	3.68125	0.770321	23.2378
TlTt18	NL	18	0.233451	0.249552	0.0280746	0.148276	0.0350537	46.4058	0.324421	23.3077	0.0191202	8.1579	0.0293932	0.0920623	0.0363911	0.210699	0.375801	0.421319	0.537163	0.88998	58.1933	1.34354	0.00328625	2.51534	0.511047	0.0192148	0.0288221	0.00640492	1.97811	0.116169	0.302403	0.191847	17.3414	0.301951	2.3434	10.6187	2.68897	0.238077	0.229595	0.109806	0.900766	0.150686	1.35472	0.157256	0.707561	1.31097	0.960242	9.41217
TlTt20	NL	20	0.575216	0.698778	0.170632	0.00821755	0.166012	82.2878	0.479399	45.8786	0.680651	17.2967	1.76094	0.137029	0.0603211	15.611	0.574382	0.974592	0.173863	1.48199	126.956	2.45395	0.453675	2.2013	0.604277	0.275275	0.1001	0.216884	6.50579	0.311	0.237154	0.0762282	31.6448	0.81216	5.77061	25.9375	5.36581	0.697653	1.50811	0.147344	0.19189	1.97995	4.51186	0.60135	1.97531	5.05564	13.5881	28.5848
TlTt22	NL	22	0.381662	0.135	0.10125	0.242035	0.0125375	43.1204	0.300685	21.7645	0.112838	8.55626	0.0674582	0.0355735	0.0130159	0.223688	0.284097	0.671084	0.578365	0.850358	58.5371	1.16227	0.0840396	2.76203	0.770521	0.0850469	0.0850469	0.0409485	3.24378	0.174567	0.447757	0.211086	17.3421	0.30345	1.69157	8.38667	2.00653	0.20815	0.189824	0.0425469	0.978198	0.0988078	1.37557	0.204038	0.705934	1.21576	0.914334	10.2009
TlTt24	NL	24	0.323262	0.537269	0.38765	0.0206342	0.125057	99.5618	0.598483	52.0807	0.632232	13.8715	1.59495	0.157703	0.317357	10.2883	0.72452	1.37783	0.332625	2.64715	116.772	3.33855	0.494359	2.11087	0.388497	0.46081	0.411936	0.404954	7.68959	0.415083	0.0496244	0.226855	29.9334	1.14489	16.0213	51.6837	13.8218	0.0937178	1.41463	0.304689	0.182513	2.61358	4.01887	0.131303	1.67547	11.5885	5.89448	56.2068

## Sheet: Table S4 (%)
ID	Type	Time	TMTD	iso15:0	ante15:0	iso16:0	iso17:0	14:0	15:0	16:0	17:0	18:0	20:0	21:0	22:0	24:0	14:1n-5	15:1n-5	16:1n-9	16:1n-7	18:1n-9	18:1n-7	20:1n-9	22:1n-9	24:1n-9	16:2n-7	16:2n-6	16:2n-4	16:3n-6	16:3n-3	16:4n-3	16:4n-1	18:2n-6	18:3n-6	18:3n-3	18:4n-3	18:5n-3	20:2n-6	20:3n-6	20:3n-3	20:4n-6	20:4n-3	20:5n-3	22:2n-6	22:4n-6	22:5n-6	22:5n-3	22:6n-3
Tl1t0	LP	0	0.00062269	0.00304372	0.000348518	0.00391246	0.000391641	0.223191	0.00631985	0.117162	0.000557791	0.0103633	0.00029191	0.000722451	0.00091173	0.00399816	0.00276442	0.000913342	0.00248583	0.0118729	0.146166	0.013769	0.000244773	0.000136302	0.00431986	0.00115688	0.000453211	0.000536697	0.000576851	0.000504744	0.000169537	0.000108988	0.0385434	0.00273797	0.0398595	0.111684	0.0343063	0.00249985	0.000334588	0.000805489	0.000361651	0.00016212	0.00573551	0.000872247	0.00175253	0.0362812	0.00559246	0.160454
Tl1t1/2	LP	0.5	0.000863579	0.000249924	0.000333232	0.000610838	0.00017021	0.218427	0.00177031	0.120251	0.000319145	0.0117918	0.000763182	0.000702472	0.000927698	0.0106511	0.00300674	0.0013645	0.00180382	0.0105047	0.152517	0.0148928	0.000197468	0.000866354	0.00379367	6.41446e-05	0.00109046	0.0025444	0	4.30898e-05	2.171e-05	4.34199e-05	0.0384561	0.00238853	0.0386985	0.107878	0.0335512	0.00196485	0.000777565	0.0013774	0.0014085	4.47141e-05	0.00580494	0.00236794	0.00160484	0.0362162	0.00668396	0.16019
Tl1t1	LP	1	0.000802653	0.00223669	0.000735942	0.00135724	0.00019164	0.222493	0.00414152	0.118868	0.000368539	0.0103184	0.000483456	0.000577975	0.00125493	0.00841634	0.00301713	0.00117813	0.00213201	0.0112336	0.13603	0.0135985	0.000349647	7.69568e-05	0.0053814	0.00145182	0.000370361	0.000355547	0.000208987	0.000179132	6.0168e-05	0.000406134	0.035451	0.00280881	0.0407201	0.114816	0.0350696	0.00308986	0.000323247	0.000923563	0.00127021	0.000123923	0.00603303	0.00111441	0.00203593	0.0367807	0.00596998	0.165193
Tl1t2	LP	2	0.000676046	0.00680411	0.000704285	0.00683304	0.000817035	0.213282	0.00822469	0.110814	0.000439004	0.0111243	4.99908e-05	0.000654263	0.00100012	0.00674463	0.00260281	0.00190103	0.00249344	0.0122118	0.139362	0.014086	0.000163481	0.000280106	0.00337089	0.00129902	0.00174019	0.00234068	0.000506289	0.000172879	1.24431e-05	0.000136874	0.0355878	0.00281334	0.0424136	0.117831	0.0330092	0.00460587	0.000598462	0.00114599	0.0011917	2.5628e-05	0.00652527	0.000678594	0.00221533	0.0292141	0.00592882	0.165369
Tl1t3	LP	3	0.000999718	0.00345982	0.000673991	0.00240846	0.000642629	0.21681	0.00550431	0.116924	0.000321315	0.0106922	0.000682126	0.00104193	0.0014296	0.00281819	0.00284078	0.001721	0.00199159	0.0121099	0.145612	0.0149692	4.7336e-05	7.18883e-05	0.000508509	0.00136081	0.00050742	0.000299839	6.97224e-05	0.000395093	0.000163932	0.000327864	0.0361305	0.00260018	0.0440375	0.125581	0.0351854	0.00523925	0.0017734	0.000503262	0.0015676	0.000409987	0.00689291	0.00120487	0.00170678	0.0221943	0.00470863	0.162858
Tl1t4	LP	4	0.000806891	0.00176316	0.000502352	0.00168355	0.000523252	0.211014	0.00274819	0.112091	0.000603753	0.0113963	0.000340319	0.000633316	0.000908842	0.00374902	0.00214775	0.000883615	0.00252922	0.0138004	0.146882	0.0139234	0.000155653	0.000199616	0.00270723	0.00144606	0.00169887	0.0026292	0.000275119	0.00023436	4.10706e-05	0.000184818	0.0380119	0.0029433	0.0447713	0.130124	0.0364331	0.00569047	0.00100868	0.000609408	0.00119483	4.22947e-05	0.00701254	0.000559953	0.00194561	0.0284074	0.00470948	0.158034
Tl1t6	LP	6	0.000738544	0.000166391	0.000600856	3.73954e-05	0.000519385	0.224727	0.00180259	0.115851	0.000358848	0.0108901	0.000445193	0.000389735	0.000921543	0.00453914	0.0025494	0.000922417	0.00234533	0.0122825	0.144684	0.0143043	7.79069e-05	1.97193e-05	0.00439382	0.00139504	0.00166076	0.00241997	0.000392066	2.86878e-05	0.000134902	0.000134902	0.037006	0.00272328	0.0390207	0.117514	0.0362623	0.00290043	0.000917027	0.000818422	0.000823613	6.94614e-05	0.00650114	0.000803119	0.00206667	0.035529	0.00486367	0.162448
Tl1t8	LP	8	0.000641679	0.000271925	0.000692172	0.000358348	0.00044615	0.205018	0.00187877	0.109004	0.000521911	0.00915695	0.000241561	0.00037347	0.000629214	0.00275639	0.00237922	0.000780725	0.0024265	0.0131569	0.142263	0.0142989	0.000251745	0.000536128	0.00252232	0.00134507	0.00166653	0.00231792	0.000375064	0.000187532	3.4358e-05	8.58949e-06	0.0363285	0.00296509	0.0417714	0.123864	0.0341882	0.00521462	0.000852607	0.000676812	0.00131798	6.19186e-05	0.00697025	0.000671717	0.00232517	0.0313022	0.00486623	0.190082
Tl1t10	LP	10	0.000473458	0.00021067	0.000624207	0.000134149	0.00043043	0.14891	0.00136547	0.107462	0.00051811	0.0100792	0.000310425	0.000501673	0.000993004	0.00179021	0.00179454	0.000762861	0.0020989	0.0119574	0.146531	0.014236	1.64398e-05	0.000299602	0.00213609	0.0012416	0.001546	0.00206667	0.000113002	0	6.50671e-05	4.06669e-05	0.0387778	0.00322633	0.0458992	0.138961	0.020336	0.0201892	0.00099044	5.82612e-05	0.00108886	4.18791e-05	0.008463	0.000518881	0.00259123	0.0376718	0.00524662	0.217231
Tl1t12	LP	12	0.000707851	0.00115045	0.000724058	0.00139946	0.000567087	0.192373	0.00300889	0.108043	0.000624618	0.00850639	0.000261112	0.000559664	0.000955608	0.00238063	0.00246708	0.000908205	0.00222971	0.0130996	0.138119	0.0145783	0.00022036	0.000506276	0.00217646	0.00125541	0.00150319	0.00220523	0.000249672	0.000166448	8.38617e-05	0.00010902	0.0358216	0.00275101	0.0392844	0.121409	0.0334476	0.005799	0.000815261	0.000446248	0.00135587	9.49974e-05	0.0072572	0.000440087	0.00222647	0.0336788	0.00490033	0.209133
Tl1t14	LP	14	0.000646741	8.62243e-05	0.000725721	1.45338e-05	0.000557868	0.197603	0.00168858	0.110246	0.000667974	0.00741206	0.000278345	0.000280222	0.000754422	0.00214163	0.00238229	0.000666302	0.0021525	0.0131933	0.134269	0.0140271	7.56967e-05	1.53279e-05	0.00590133	0.00143108	0.00133518	0.00256708	0.000408817	0.000104063	5.24299e-05	2.247e-05	0.0353723	0.00281991	0.0409226	0.123302	0.032311	0.00800506	0.000881431	0.000666822	0.00154265	3.85662e-05	0.00749078	0.000431592	0.00227708	0.0385115	0.00471393	0.199005
Tl1t16	LP	16	0.000513486	0.00208826	0.000663331	0.000182209	0.000552152	0.1943	0.00126116	0.107528	0.00132182	0.00750688	0.000334382	8.63172e-06	0.000616644	0.0132579	0.00145949	0.00127116	0.00217788	0.0142606	0.129111	0.0129527	0.00150115	0.000742452	0.00321287	0.00134517	0.00152173	0.00253901	0.000533708	0.000406635	0.000349995	0.000110974	0.0335198	0.00305018	0.0411258	0.1265	0.0311028	0.00999158	0.000917227	0.000585278	0.00149445	0.000263727	0.00783846	0.000860813	0.00240858	0.0350333	0.0124167	0.189259
Tl1t18	LP	18	0.000776407	0.00280214	0.00120914	5.82318e-05	0.000794076	0.235531	0.00170817	0.117395	0.000813683	0.00971916	6.02826e-05	0.000697925	4.07097e-05	0.00124493	0.00182491	0.000135416	0.00239564	0.0155375	0.136894	0.0162041	0.000232522	0.00064484	0.00261682	0.00163542	0.00299498	0.00427572	0.000178689	0.000317669	7.00226e-05	0.000100032	0.0333127	0.00256459	0.036187	0.110729	0.0353413	0.00183102	0.00107483	0.00122837	0.00286378	0.000659289	0.00647946	0.000679343	0.00214546	0.0265864	0.00404348	0.175364
Tl1t20	LP	20	0.000368051	0.00243211	0.000656846	0.000170564	0.000507796	0.207533	0.00137584	0.114197	0.00203119	0.00918756	0.000343849	0.000102915	0.000621307	0.0153503	0.00142285	0.00136886	0.00191741	0.0131868	0.128888	0.0133945	0.00100991	0.000246155	0.00552976	0.00135778	0.00164939	0.00220526	0.000459113	0.000394838	0.000231315	0.000111031	0.0319075	0.00259629	0.0342188	0.10196	0.0336458	0.00257808	0.00106045	0.00127823	0.000876613	0.000257267	0.00687547	0.000504598	0.00275514	0.0448711	0.0120244	0.194338
Tl1t22	LP	22	0.000570837	0.00220509	0.000541866	0.000235951	0.000468985	0.201285	0.00146757	0.110296	0.00142233	0.00755163	0.000283658	2.37976e-05	0.000678436	0.0104411	0.00172341	0.00133508	0.00224685	0.0147082	0.11763	0.0125909	0.000697703	0.000425441	0.00648116	0.00157617	0.00165343	0.00232562	0.000576115	0.000474906	0.000164745	7.06048e-05	0.0293969	0.00307233	0.0433769	0.12689	0.0371102	0.00708412	0.00076265	0.000602092	0.00187428	0.000557438	0.0079759	0.000750723	0.00250752	0.0361306	0.00902032	0.190737
Tl1t24	LP	24	0.000762547	0.00205322	0.000516204	9.3854e-05	0.000610293	0.207307	0.00140362	0.107944	0.00120281	0.00607822	0.000218609	3.05671e-05	0.000436738	0.0189041	0.00183637	0.000888608	0.00229304	0.0151767	0.107858	0.0111662	0.00106319	0.000216523	0.0104586	0.00178039	0.00178634	0.00259615	0.000623997	0.000395998	6.04594e-05	7.85972e-05	0.0271284	0.00311228	0.0444263	0.129634	0.0373309	0.00878572	0.000866167	0.0011817	0.00229122	0.000535449	0.00817073	0.0023267	0.00218427	0.0383232	0.0153723	0.172489
Tl2t0	LP	0	0.00127393	0.00205167	0.000882519	0.000335654	0.00105567	0.230263	0.00211203	0.119646	0.000762857	0.00929284	3.15887e-05	0.00119256	3.99981e-05	0.00200559	0.00297396	0.000281303	0.00579506	0.0323495	0.121708	0.0165256	0.000174819	0.000555126	0.00495923	0.00225343	0.00181203	0.00551354	0.000717867	0.000351131	0.000157254	7.86268e-05	0.0268936	0.001992	0.0455462	0.131899	0.0503349	0.00197492	0.000635635	0.0012069	0.00202426	0.000850189	0.00714644	0.00157765	0.00165362	0.0193246	0.00363932	0.136149
Tl2t1/2	LP	0.5	0.000899961	0.000324545	0.000638621	0.000137644	0.000684483	0.199687	0.00215667	0.124314	0.000834214	0.0110572	3.28827e-05	0.000595881	0.000788319	0.00515202	0.002658	0.00077032	0.00707253	0.0337414	0.132167	0.0186776	0.000286758	0.000457827	0.00348673	0.00139723	0.000333186	0.000193463	0.000812255	0.000194941	0.000130956	0.000152783	0.0263215	0.00172938	0.0397316	0.112581	0.0356182	0.00731328	0.00132893	0.00264669	0.00125869	0.000101145	0.00687651	0.000370565	0.00209063	0.0334728	0.00461694	0.174106
Tl2t1	LP	1	0.000897791	0.000290674	0.000400659	0.000444933	0.000762427	0.211472	0.00274179	0.117899	0.000930964	0.00870251	0.000411253	0.000389184	0.000491573	0.00413559	0.0020102	0.000649313	0.00492298	0.0278891	0.12407	0.0152794	0.000653824	0.000217862	0.00401356	0.00180661	0.00168564	0.00293575	0.000552627	0.000138157	0.000229296	0.000180161	0.0268691	0.00222349	0.0457344	0.132573	0.0472619	0.00415546	0.000519564	0.00219558	0.00154328	0.000118065	0.00824092	0.000514011	0.00178196	0.0295687	0.00406484	0.155431
Tl2t2	LP	2	0.000879774	0.0041188	0.000301809	0.00561092	0.00127862	0.201776	0.00812229	0.115567	0.000825209	0.00896949	0.00010223	0.00035554	0.000593095	0.00477758	0.00160852	0.00106472	0.00464	0.0260312	0.12193	0.0148323	0.000271194	0.000407123	0.0033295	0.00168592	0.00154011	0.00248787	0.00044077	0.00030303	0.000222074	9.25306e-06	0.0261858	0.00214812	0.0446528	0.130461	0.0464795	0.00344388	0.00101316	0.00193164	0.00129593	8.57598e-05	0.00816083	0.000552228	0.00179189	0.0312786	0.00441853	0.162018
Tl2t3	LP	3	0.000882509	0.000799294	0.000425313	0.000912193	0.000786573	0.202937	0.00269123	0.115752	0.00095887	0.00880213	0.000122838	0.000510125	0.000707705	0.00366368	0.00202968	0.000110868	0.00524524	0.0278627	0.125862	0.0162255	0.000278107	0.000320677	0.00199171	0.00170891	0.00173902	0.00275533	0.000652374	0.000311016	0.000160521	6.87947e-05	0.0260686	0.00222975	0.0452276	0.135391	0.0443106	0.00627288	0.000813497	0.00109509	0.0015586	2.36151e-05	0.00816753	0.000330344	0.00178268	0.0272157	0.00448258	0.167755
Tl2t4	LP	4	0.000949818	0	9.19476e-05	7.97067e-05	0.000731322	0.204461	0.00199003	0.11588	0.000885638	0.00933858	0.000110019	0.000283824	0.000508471	0.00756959	0.00168707	0.000801	0.00612994	0.0322359	0.124962	0.0151661	0.000214488	0.000497364	0.00695845	0.0017261	0.00182049	0.00261611	0.000726966	0.000142676	0.000164307	0.000328614	0.0259353	0.00231491	0.0455796	0.135213	0.0455789	0.00456002	0.000756621	0.00190556	0.00146644	2.82007e-05	0.00835813	0.000641049	0.00192452	0.0282181	0.00482489	0.153637
Tl2t6	LP	6	0.000927622	0.000236013	0.000311108	0.000151895	0.000717834	0.205484	0.0020544	0.118944	0.000969898	0.00808596	0.000235866	0.000508836	0.00052905	0.00690681	0.00208815	0.000648783	0.00518131	0.0275792	0.127383	0.0157321	0.00020343	0.000114424	0.00729606	0.0017952	0.00154189	0.00287452	0.000793482	0.000194209	0.000111827	0.000178923	0.0265347	0.00243806	0.04577	0.133537	0.0453166	0.0026155	0.000818203	0.0016879	0.00119766	3.4548e-05	0.00812424	0.000575334	0.00189196	0.0305408	0.00574982	0.153388
Tl2t8	LP	8	0.000698093	0.00548661	0.000370044	0.00485797	0.00125767	0.166845	0.00766425	0.115684	0.000915988	0.0118453	0.000305469	0.000375035	0.000671692	0.0159535	0.00169336	0.00134847	0.00412582	0.0215429	0.123316	0.0144091	4.4981e-05	6.83119e-05	0.0158693	0.00145384	0.00119814	0.00207482	0.00108951	0.000198761	0.000185448	0.00017803	0.0258706	0.00201409	0.0377137	0.11573	0.0410497	0.00258736	0.000926087	0.00265681	0.000427785	3.05561e-05	0.00740334	0.000679324	0.00200803	0.0436562	0.012289	0.183229
Tl2t10	LP	10	0.000619435	0.000522014	0.000466333	0.000549057	0.000447952	0.130352	0.00214376	0.110283	0.00137941	0.0143759	0.000313345	0.000469519	0.000804597	0.00270135	0.00133053	0.00109441	0.00425521	0.0211982	0.13766	0.0164481	0.000227306	0.00054936	0.00411101	0.00106468	0.00105039	0.00195787	0.000720011	0.000115202	0.000108829	0.000108829	0.0294782	0.00233609	0.0440195	0.132852	0.0151183	0.0281173	0.001277	0.000957752	0.00111326	7.47153e-06	0.00918849	0.000440464	0.00258341	0.0435879	0.00466498	0.22683
Tl2t12	LP	12	0.000757865	0.000345365	0.000482208	0.000362465	0.000399414	0.193604	0.00216996	0.113089	0.000991878	0.0073941	0.000225139	0.00038463	0.000635801	0.00197715	0.00192042	4.59764e-05	0.00523875	0.0262669	0.128848	0.0159537	0.000219675	0.000910495	0.00217726	0.00143162	0.00153197	0.00254213	0.000694317	0.000249415	6.79258e-05	6.79258e-06	0.0274552	0.00231052	0.039745	0.122336	0.0375683	0.00462797	0.00100094	0.000708998	0.00132906	0	0.00822941	0.000419364	0.00232672	0.0348118	0.00439593	0.201811
Tl2t14	LP	14	0.000857323	0.00042386	0.000383006	0.000377024	0.000589512	0.204557	0.00234402	0.114393	0.000787755	0.00654293	0.000171091	0.0004037	0.000460357	0.00287445	0.00182024	0.000442668	0.00509419	0.0270582	0.120671	0.0141987	0.000193676	0.000119832	0.00416665	0.00190835	0.00173534	0.00310894	0.000913922	0.000412057	0.000239546	4.79093e-05	0.0271035	0.00262743	0.0464555	0.138415	0.0401201	0.00815777	0.00117663	0.00133461	0.00210506	6.57831e-05	0.00940634	0.000356037	0.00211716	0.0319976	0.00399691	0.167268
Tl2t16	LP	16	0.000753573	0.00176549	0.000349071	6.11019e-05	0.000466326	0.204482	0.00200047	0.1168	0.00147441	0.00759356	0.000267072	1.41512e-05	0.000391565	0.0235348	0.00208529	0.00100817	0.00443235	0.0243849	0.110503	0.0132232	0.00103958	0.000329361	0.0185803	0.00168845	0.00163332	0.00248099	0.000666653	0.000395825	0.000293895	0.000146948	0.0243202	0.00204826	0.0359929	0.107023	0.0368253	0.00307403	0.00105978	0.00277833	0.000965614	0.000425158	0.00728108	0.000928833	0.00220021	0.0454394	0.017037	0.169756
Tl2t18	LP	18	0.000580045	0.00161057	0.000457679	0.000416001	0.000526737	0.196917	0.00175542	0.110914	0.000899596	0.00641762	0.000242621	4.27449e-05	0.000552978	0.0101369	0.00218036	0.000934307	0.00412039	0.0237721	0.119676	0.0140756	0.00070798	0.000611749	0.00277869	0.00176646	0.00170103	0.00264077	0.000641263	0.000527394	0.000181171	8.45464e-05	0.0275575	0.00237726	0.0391882	0.115614	0.0390374	0.00324251	0.0013163	0.000951694	0.0010448	0.000398018	0.00827404	0.00015535	0.00264077	0.0368375	0.00832876	0.205166
Tl2t20	LP	20	0.000438833	0.00163048	0.000473365	0.000545229	0.000510443	0.181915	0.00143983	0.111719	0.00177983	0.00674341	0.000192733	2.77189e-05	0.000543863	0.00855019	0.00214704	0.000940995	0.00377155	0.0231252	0.121994	0.0149499	0.00130212	0.00043477	0.00256519	0.0015929	0.0015794	0.00266608	0.00077533	0.000401267	0.000123358	6.85325e-06	0.0275768	0.00247642	0.0398164	0.114373	0.0318577	0.00856504	0.00131845	0.000638186	0.00153148	0.000479911	0.00839524	0.00102251	0.00306103	0.0378786	0.00717669	0.218946
Tl2t22	LP	22	0.000611059	0.00162788	0.000294617	5.05018e-06	0.00074478	0.216103	0.0020923	0.119987	0.0012498	0.00660857	0.000130701	2.10532e-05	0.000354823	0.016875	0.00250575	0.000699609	0.00333778	0.0217008	0.100665	0.0113392	0.000931124	0.000292936	0.0184122	0.00180964	0.0016661	0.00273753	0.00065087	0.000495901	0.00036957	0.000229029	0.0234708	0.00251662	0.0413325	0.113364	0.0350272	0.0074052	0.0011825	0.00315333	0.00189757	0.000536036	0.00787608	0.00182641	0.0020377	0.0495157	0.0124171	0.161892
Tl2t24	LP	24	0.00060052	0.00153583	0.00034824	0.000121913	0.000720628	0.204874	0.00196445	0.116332	0.00173316	0.00704952	0.000210344	7.05875e-05	0.000445085	0.0145803	0.00232037	0.000693011	0.00311618	0.0218771	0.114394	0.0124365	0.000249281	0.000261909	0.0136326	0.00170506	0.00154922	0.0027226	0.000170885	0.00105764	0.000125655	9.77318e-05	0.025431	0.00252253	0.0425025	0.111981	0.0317555	0.00767151	0.00115726	0.00173352	0.00182119	0.000138986	0.00795347	0.000598593	0.00256322	0.045782	0.0113066	0.178085
TlTt0	LP	0	0.000989296	0.00206868	0.000529198	0.00246518	0.000622526	0.220593	0.00490716	0.111047	0.000344028	0.0115232	0.00067158	0.000608498	0.00124153	0.00818394	0.00244285	0.00132542	0.0015523	0.00972237	0.14904	0.0143298	0.00223001	0.00162492	0.00496058	0.00103719	0.000164633	0.00306217	0.000514262	0.000248836	0.000601782	0.000250743	0.0362128	0.00177162	0.0339308	0.0976242	0.0258849	0.00467467	0.000752661	0.00107767	0.000946794	0.000206573	0.00511067	0.000808425	0.00198406	0.0362005	0.00672196	0.187189
TlTt1/2	LP	0.5	0.000795712	0.00140256	0.000296475	0.00044976	0.000302871	0.215492	0.00131135	0.10371	0.000407711	0.0104126	8.35693e-05	0.000288455	0.000241867	0.00097804	0.00183921	3.44803e-05	0.00252129	0.0137103	0.128735	0.0133492	0.000168179	0.000474334	0.0016469	0.00162721	0.00580643	0.00540841	0.000165143	0.000141552	0.000106977	0.000249613	0.0378083	0.00278343	0.0450508	0.132794	0.04433	0.000374706	0.00132582	0.000790625	0.0027419	0.000306015	0.00753908	0.0010763	0.00236371	0.0212973	0.00546437	0.181796
TlTt1	LP	1	0.00119956	0.00993032	0.000579268	0.0122469	0.00101446	0.215364	0.0153508	0.10647	0.000577676	0.00992674	0.000447637	0.000901311	0.000789869	0.00668375	0.00178515	0.00208524	0.00202368	0.0110038	0.131418	0.0119236	0.000261536	0.000353058	0.00521776	0.00111859	0.00138762	0.00260532	0.00204026	0.000385223	8.6261e-05	0.000373798	0.034186	0.00240888	0.0411977	0.119441	0.0350932	0.0024269	0.000367801	0.00144178	0.0008291	0	0.00573645	0.00065091	0.00181118	0.0351241	0.00513387	0.1586
TlTt2	LP	2	0.000802671	0.00113663	0.000215567	0.000297292	1.00099e-05	0.214255	0.00134241	0.0982451	0.000500496	0.0106131	0.000307762	2.06558e-05	0.000259795	0.0017544	0.00168775	1.97527e-05	0.00217653	0.0133189	0.135598	0.0136777	3.09678e-05	0.000783837	0.00349571	0.00168998	0.00445632	0.00498947	1.01363e-05	0.000243271	6.12836e-05	0.000296204	0.0386732	0.00274233	0.039939	0.131052	0.0417097	0.00206694	0.00153646	0.00095114	0.00239819	0.00107287	0.00639365	0.000872321	0.00187163	0.0206112	0.00500572	0.190807
TlTt3	LP	3	0.000755165	0.000396688	5.83364e-05	0.000342192	0.000464841	0.227078	0.00178511	0.11559	0.00059595	0.00994288	0.000500827	0.000344334	0.000977525	0.00529129	0.00204449	0.00119951	0.00210422	0.0114128	0.142957	0.0136708	4.91653e-05	0.000385776	0.0052313	0.00124571	9.58236e-05	0.00408448	0.000422431	0.000193111	7.29716e-05	0.000182429	0.0360759	0.00232011	0.0375392	0.109149	0.0300975	0.00479861	0.000273801	0.00119477	0.00105205	3.75733e-05	0.00559635	0.000913546	0.00227923	0.0414045	0.00538729	0.172406
TlTt4	LP	4	0.000739449	0.000398818	0.000322853	0.000105638	0.00036862	0.218171	0.00154781	0.106339	0.000523828	0.00891591	0.000387725	0.000680592	0.000634449	0.00393992	0.00164504	0.000957107	0.00229309	0.0139038	0.151433	0.0129593	0.000180064	0.000455766	0.00330578	0.00168649	0.00172549	0.0029538	0.000333982	0.000333982	4.94912e-05	0.000613691	0.0395418	0.00284739	0.0442095	0.137102	0.0357403	0.00789142	0.00103316	0.00083058	0.00142706	5.09664e-05	0.00718084	0.000458327	0.00223631	0.0259238	0.00537964	0.150242
TlTt6	LP	6	0.00089256	0.000118392	0.000398229	0.000195932	0.000516772	0.238712	0.00208803	0.112966	0.000527767	0.0139917	0.00051835	0.000623945	0.000901757	0.00490424	0.00136093	0.00101975	0.00243463	0.0143008	0.157456	0.0115724	0.000158741	0.000126278	0.00727353	0.00165743	1.10495e-05	0.0046408	0.00047876	0.000389689	7.85348e-05	0.000190727	0.0409501	0.00277444	0.0434284	0.136323	0.0436104	0.00182543	0.00109068	0.00160732	0.000750988	0.000161751	0.00698808	0.0011198	0.00200912	0.0322738	0.00493448	0.0996469
TlTt8	LP	8	0.000616328	0.000489256	0.000394838	0.000546894	0.000175372	0.203017	0.00204288	0.107174	0.000420894	0.00850209	7.18927e-05	0.000443312	0.000855697	0.00214422	0.00152973	0.000769992	0.00206406	0.0131191	0.142898	0.0134693	0.000126595	9.15515e-06	0.00168376	0.00138348	0.00153329	0.00261716	0.000426207	0.000204224	8.05261e-05	1.78947e-05	0.0380034	0.00261901	0.0411184	0.120939	0.0339643	0.00353026	0.000961375	0.00033877	0.00108726	7.37122e-05	0.00701954	0.000561602	0.00243135	0.033562	0.00537816	0.199585
TlTt10	LP	10	0.000493737	8.52424e-05	0.000364218	0.000180257	0.000482906	0.164779	0.00154988	0.114604	0.000839148	0.00955623	0.000259625	0.00049008	0.000953349	0.00224325	0.0014428	0.000726409	0.00212404	0.0126101	0.144718	0.0132381	0.000326552	0.000214902	0.0042263	0.0013445	0.00149566	0.00268105	0.000408838	0.000384789	7.27006e-05	0.000105012	0.0404565	0.00294339	0.0445096	0.1294	0.0235868	0.0154924	0.00062823	0.000752223	0.00066549	8.31862e-06	0.00756804	0.000598457	0.00248944	0.0430821	0.0051685	0.199649
TlTt12	LP	12	0.00068301	0.000122208	0.000250848	0.00018214	0.000367963	0.204054	0.0017045	0.107385	0.000446812	0.00721549	4.71387e-05	0.000501684	0.000818574	0.00719253	0.00144729	0.000479748	0.00230039	0.01375	0.12925	0.0124563	0.000142296	0.000294998	0.0132065	0.00146592	0.00187533	0.00251584	0.000459106	0.000326032	0.000127389	0.00011398	0.0368727	0.00293706	0.0428107	0.122641	0.0315446	0.00640214	0.000734129	0.000782156	0.00140162	0.000510935	0.00717096	0.00073129	0.0023734	0.0377315	0.00675432	0.18742
TlTt14	LP	14	0.000622058	2.76445e-05	0.000311001	2.79583e-05	0.000367132	0.191713	0.00156193	0.105116	0.000437734	0.00741272	0.000318372	0.000597331	0.000938187	0.0014523	0.00161015	0.000494586	0.00252104	0.0150911	0.137077	0.0132049	5.82462e-05	0.000243258	0.00439488	0.00154674	0.00198664	0.00297996	0.000228779	0.000436111	4.32248e-05	0.000172899	0.0389621	0.00325765	0.0462033	0.132984	0.0308566	0.00854203	0.000825675	0.000663489	0.00166924	0.000111283	0.00857868	0.000555965	0.0025202	0.0339712	0.00539405	0.191911
TlTt16	LP	16	0.000553533	0.00150715	0.000372821	9.62687e-05	0.000559141	0.192552	0.00129299	0.10243	0.00123173	0.00733647	0.000390332	0	0.000471109	0.0146704	0.0014058	0.00123928	0.00251369	0.0147508	0.129054	0.0124476	0.001195	0.000490721	0.0038388	0.00150656	0.00162872	0.00307013	1.64116e-05	0.000114881	0.000198448	7.4418e-05	0.0361154	0.00322991	0.042256	0.125683	0.0256503	0.0118475	0.000981529	0.000761531	0.00158381	0.000604574	0.00770396	0.000119115	0.00288399	0.0379087	0.0120099	0.193652
TlTt18	LP	18	0.000895016	0.00179764	0.000451714	0.000503458	0.000376702	0.208493	0.00129062	0.108271	0.0014503	0.00847211	0.000366763	9.71673e-06	0.000752817	0.0153494	0.00113813	0.00144024	0.00217923	0.0126152	0.130645	0.0131553	0.00078665	0.00084561	0.00875367	0.00108837	0.00167515	0.00213889	0.000143046	7.62914e-05	0.000172971	8.64854e-05	0.0351419	0.00239575	0.0314649	0.0953442	0.0265642	0.0035179	0.000875185	0.00141603	0.00127657	0.000633339	0.00555717	0.00184904	0.00228112	0.0501239	0.0117838	0.204354
TlTt20	LP	20	0.000564783	0.00162651	0.000397901	0.000416537	0.000492061	0.194491	0.00132635	0.100745	0.00114814	0.00742189	0.000285035	0	0.000599675	0.00963978	0.00141785	0.00106246	0.00245396	0.0148163	0.131618	0.0132436	0.000933968	0.00032761	0.00193366	0.00150498	0.00187048	0.00273047	7.94348e-05	9.38775e-05	0.000123703	7.27667e-06	0.0365971	0.00312886	0.0395809	0.119961	0.0310482	0.00561636	0.000886113	0.000335085	0.0012814	0.000636952	0.0075791	0.000763726	0.0025683	0.0355096	0.00964703	0.211487
TlTt22	LP	22	0.000450343	0.00161863	0.000424095	2.14454e-05	0.000548776	0.21421	0.00143487	0.108843	0.00143693	0.0081198	0.000399612	2.98005e-05	0.000517239	0.0118977	0.00133711	0.00101166	0.0023911	0.0138786	0.120915	0.0120893	0.00113928	0.000663435	0.00700121	0.00144403	0.00167624	0.00246719	7.31189e-05	8.04308e-05	5.89432e-05	0.000198933	0.0332669	0.00285575	0.0376676	0.111857	0.0294391	0.00609887	0.000859525	0.00176429	0.00164649	0.000349026	0.00650583	0.0015466	0.00214791	0.0464944	0.0106707	0.190453
TlTt24	LP	24	0.000546244	0.00132397	0.000375453	4.66316e-05	0.000477759	0.205228	0.00143596	0.106433	0.00152748	0.00815365	0.000303436	0.00167321	0.000775415	0.020593	0.00162642	0.000982601	0.00281889	0.0174571	0.128137	0.0116761	0.00114497	0.000597178	0.0118632	0.00151475	0.00180553	0.003442	2.72558e-05	8.85813e-05	0.000164788	0.000192252	0.0347596	0.00297314	0.0378677	0.110667	0.0298728	0.00635383	0.000948542	0.00266997	0.00171113	0.000445461	0.00826872	0.00101031	0.00228758	0.0419908	0.0162355	0.169506
Tl1t0	LN	0	0.000752794	0.000514287	0.000324813	0.000711748	2.76517e-05	0.228062	0.00175942	0.125993	0.000788073	0.0508619	8.50171e-05	0.000456482	0.000200946	0.000333734	0.00159003	0.00166424	0.00198578	0.00350273	0.300993	0.00636284	0.000199608	0.0123422	0.00210054	5.55769e-05	0.00026399	0.000222307	0.00827422	0.000350009	0.00124147	0.00102986	0.0989687	0.00113917	0.00800268	0.0372376	0.00986158	0.00133419	0.00128485	0.000779574	0.00461995	0.000740935	0.00697416	0.000479041	0.00377486	0.00859815	0.00534799	0.057806
Tl1t1/2	LN	0.5	0	0.000471813	0.000223491	0.000577625	0.000279048	0.235057	0.00144029	0.125847	0.000520044	0.0482478	2.59986e-05	0.000157044	0.000197519	0.00106495	0.00147108	0.00131405	0.00136634	0.00407374	0.304626	0.00715173	0.000287765	0.0124883	0.000950149	8.92272e-05	8.92272e-05	0.000242188	0.00715418	0.000770648	0.000983633	0.00135897	0.0942335	0.00120185	0.00871345	0.0357276	0.00984191	0.00131613	0.0012847	0.00109928	0.00402515	5.33132e-05	0.00576776	0.000479432	0.0030858	0.0104767	0.00534002	0.058826
Tl1t1	LN	1	8.26758e-05	0.000326999	0	6.20082e-05	8.35134e-05	0.193598	0.000694879	0.10837	0.000856012	0.0479381	4.27947e-05	0.00012925	0.0115744	0.000569706	0.000427314	0.000906388	0.000374841	0.00291545	0.365358	0.00634204	0.0035956	0.00368398	0.00482411	0.000104908	0.00012589	2.09816e-05	0.0116069	0.000528548	4.26078e-05	4.26078e-05	0.0981755	2.15032e-05	0.00634345	0.028625	0.0041427	0.00437614	0.000981027	0.000109003	0.00401482	0.000548472	0.00830168	0.0156956	0.00332708	0.00488574	0.00403799	0.0511862
Tl1t2	LN	2	0.00104969	0.00066213	8.9477e-05	0.00072394	7.31259e-05	0.232455	0.00157481	0.128083	0.000859229	0.0579602	0.000206095	0.000961976	0.000265705	0.00147735	0.00153229	0.00205628	0.00176873	0.00362865	0.307248	0.00679757	0.000904923	0.0126358	0.00335612	1.83719e-05	3.67438e-05	0.000367438	0.0101077	0.000518344	0.00151098	0.00197733	0.0921541	0.00114855	0.0077574	0.037066	0.00925949	0.00113817	0.0010499	0.000381781	0.0038036	0.000230521	0.00560649	0.000806173	0.00306863	0.00668079	0.00421945	0.0447214
Tl1t3	LN	3	0.000565264	0.00109716	2.07012e-05	0.000439659	4.22956e-05	0.193909	0.0014077	0.100661	0.000338365	0.0433881	0.00396625	0.000196377	0.00338101	0.000110973	4.12218e-05	0.000646833	0.000548425	0.00316401	0.348653	0.00605865	0.000588827	0.00262752	0.000959424	2.12524e-05	6.37572e-05	0.000127514	0.0136198	0.00044971	0.000474734	0.000215788	0.0930611	0.00119794	0.00668669	0.0321088	0.00454953	0.00127273	0.00108202	0.000132492	0.00448885	0.00697772	0.0117858	0.00133225	0.00411143	0.0159085	0.0216708	0.0658485
Tl1t4	LN	4	0.00100314	0.000675341	0	2.1344e-05	0.000107799	0.179995	0.00141401	0.0964747	0.00079771	0.0426252	0.00364579	0.00155713	0.00286493	0.000905076	8.40495e-05	0.000893424	0.00047309	0.00307511	0.319677	0.00534434	0.000755929	0.000337652	0.0182202	0	2.16664e-05	0.000649991	0.0146492	0.000633125	6.59975e-05	0.000175993	0.0849057	0.00102143	0.00688355	0.0309678	0.00387263	0.00192391	0.000810435	0.000315169	0.00387398	0.00611682	0.0106018	0.00178829	0.00352728	0.00801702	0.0226688	0.115562
Tl1t6	LN	6	0.000543563	0.000825407	0.000249542	3.88268e-05	9.80482e-05	0.197508	0.0013629	0.108288	0.000647118	0.0440125	0.00387874	0.00129489	0.00303331	0.000905532	0.000382236	0.000599786	0.000528095	0.00359889	0.331164	0.00639493	0.000829111	0.000409481	0.00062068	3.94133e-05	0.000472959	9.85332e-05	0.0136022	0.000595716	0.000200093	0.000120056	0.0873355	0.00203985	0.00920963	0.0345119	0.00444389	0.00103773	0.000675703	8.19034e-05	0.00401812	0.00667626	0.0113225	0.00177066	0.00385405	0.0150238	0.00528033	0.0903766
Tl1t8	LN	8	0.00192742	0.000998292	0.000816784	0.000275352	0.000185423	0.282529	0.00217811	0.166496	0.00101983	0.0793618	0.00598603	0.000956571	0.00808491	0.00107031	0.00045179	0.00667764	0.000277418	9.24732e-05	0.23679	0.0494487	0.000382431	0.000967986	0.00215196	0.000652192	0	0.00316779	0.0042247	0.000469411	0.00179743	0.000851412	0.0186824	9.54866e-05	0.0014323	0.00913432	0.00203324	0.00221262	0.000290421	0.000290421	0.000389684	0.00204584	0.0222558	0.00428307	0.00206838	0.0211011	0.0365554	0.0168404
Tl1t10	LN	10	0.000672042	0.00158109	0.000595771	0.000440313	4.68173e-05	0.194594	0.00132904	0.103589	0.000585216	0.0461732	0.00460618	0.000241523	0.00374247	0.00105639	0.000981017	0.00115481	0.000466965	0.00368905	0.355391	0.00561241	0.000506937	0.000708775	0.000345765	4.70488e-05	0.000117622	0.000141147	0.0186078	0.00104298	0.000477715	9.5543e-05	0.0888108	0.00163943	0.00701579	0.0340606	0.00415584	0.00131164	0.000659952	0.000342197	0.00489494	0.00671517	0.0125011	0.00159756	0.00445149	0.00777906	0.00510266	0.0703218
Tl1t12	LN	12	0.000595961	0.00103125	6.31378e-05	0.000553404	6.44999e-05	0.19213	0.00231507	0.110319	0.0010105	0.0507223	0.0040984	0.00110915	0.00401764	0.00169231	0.00071244	0.000869735	0.00120089	0.00355981	0.336068	0.00574453	0.000798177	0.000314268	0.000408307	0.000194457	0.000367307	0.000216063	0.01524	0.00047897	0.000219382	6.58145e-05	0.0822072	0.00192648	0.00874666	0.0476497	0.00680322	0.00100391	0.000336745	0.000224497	0.00424731	0.00580616	0.0123231	0.00124156	0.00447683	0.00847724	0.00597312	0.0723754
Tl1t14	LN	14	0.000766237	0.00153474	0.000233125	0.000707312	0	0.187748	0.00190387	0.108474	0.000873231	0.0479365	0.0041696	0.00100336	0.00422369	0.000499884	0.00139265	0.000959485	0.00134606	0.00348394	0.328121	0.00540347	0.00102331	0	0.0045228	0.000179499	0.000119666	0.000378942	0.0157156	0.000622998	0.000101253	0.000182256	0.0782792	0.00157389	0.00848267	0.0467836	0.00677733	0.00162685	0.000994696	0.000103614	0.00427513	0.00544297	0.0117739	0.0010002	0.00331019	0.00920358	0.00922479	0.0875205
Tl1t16	LN	16	0.00143844	0.00160586	0.000481757	0.000162408	0.000539022	0.187775	0.00110117	0.105797	0.00208578	0.0449359	0.00439535	0.000169262	2.43299e-05	0.00853473	0.00107352	0.00279788	0.000420755	0.00324919	0.32366	0.00557129	0.0012809	0.00437992	0.000197809	0.000471033	2.35517e-05	0.00070655	0.0167308	0.000617022	0.00119567	0.000119567	0.0736672	0.00219648	0.0110548	0.0553426	0.0100101	0.00209132	0.00403771	0.000269181	4.92524e-05	0.0046051	0.0126643	0.00472441	0.0049048	0.0130219	0.000951597	0.0788667
Tl1t18	LN	18	0.000825356	0.00199732	0.00012886	0.000260644	0.000372979	0.180095	0.00126713	0.104801	0.00210623	0.0432259	0.00377754	0.000135822	0.00430485	0.0360125	0.0008767	0.00166683	0.000481434	0.00312934	0.297096	0.00512654	0.00101814	0.000274885	0.000601846	0.000485066	6.61454e-05	0.000771696	0.0150853	0.000733158	0.000492517	0.000268645	0.0672821	0.00268899	0.0121344	0.0581814	0.0118686	0.00177572	0.003276	0.000412364	4.61088e-05	0.0041959	0.0111135	0.00205019	0.00291355	0.0164575	0.0205132	0.077606
Tl1t20	LN	20	0.00147032	0.00166155	0.000270002	0.000231056	6.36523e-05	0.190713	0.00105925	0.109058	0.0023127	0.0379313	0.00371837	0.000197024	0.00418512	0.0106662	0.00117869	0.00205156	0.00055023	0.00414792	0.298413	0.00551816	0.000831449	0.00228173	0.000425327	0.000788928	0.000127934	0.00102347	0.0150827	0.000644559	0.000865996	0.000346398	0.0666725	0.00218525	0.0149252	0.0668496	0.0148236	0.000330239	0.0035669	0.000952651	2.22952e-05	0.00383477	0.0109719	0.000601484	0.00486881	0.0201551	0.000113358	0.0913101
Tl1t22	LN	22	0.00131614	0.00227107	0.000153106	0.000412915	0.00013034	0.192238	0.000893124	0.103074	0.00182477	0.0410394	0.00435473	0.000618614	0.00506072	0.011682	0.000965439	0.00290638	0.000260009	0.00392616	0.339834	0.00479346	0.00131724	2.72172e-05	0.000302537	0.000497744	0	0.000628729	0.0228864	0.00084471	0.000531988	0.000664986	0.0740755	0.00217471	0.0101218	0.0539079	0.0084665	2.70491e-05	0.00372909	0.00103435	0.000136961	0.00457451	0.0123501	0.00161484	0.00301865	0.0102784	0.000529241	0.0685046
Tl1t24	LN	24	0.000797432	0.000262833	0.000175222	0.000265816	0.000179002	0.278368	0.00254075	0.156477	0.00492257	0.0634681	0.000642082	0.000184689	0.00269456	0.0598343	0.00113398	0.00238428	8.92703e-05	0.0027674	0.200585	0.0190036	0.009322	0	0.00245515	0.000449719	0.00152905	0.0028782	0.0142175	0.00199388	0.00146121	0.000273976	0.00933817	0.00036872	0.00871981	0.0159652	0.00785131	0.000278608	0.00130837	0.000560728	0.00357381	0.00188095	0.0200653	0.000272992	0.00264137	0.0353852	0.00288244	0.0575504
Tl2t0	LN	0	0.00224481	0.00269531	0.000697609	0.000801735	0.000113378	0.203115	0.00196601	0.11654	0.00140912	0.0437496	0.000248992	1.67114e-05	0.000134518	0.00161486	0.00161013	0.00605667	0.00479804	0.00898225	0.251545	0.00651607	0.000167028	0	0.00172595	0.000325538	0.000406923	0.0006348	0.0243723	0.000672453	0.00497461	0.004297	0.0679441	0.00163479	0.0127447	0.0681647	0.0222597	0.00100838	0.00103165	0.00052428	0.00345497	0.000663762	0.00544676	0.00151352	0.0024434	0.0182588	0.00420558	0.096269
Tl2t1/2	LN	0.5	0.00175626	0.00198468	0.000771819	0.00153328	5.63193e-05	0.206818	0.00250844	0.123108	0.000957428	0.0590342	0.00083693	0.000174326	0.000613914	0.000236428	0.00192113	0.00308401	0.00435349	0.00589831	0.281476	0.00506363	0.000116157	0.0141125	0.00202029	0.00025469	0.000198093	0.000198093	0.0248082	0.000826939	0.00632139	0.00112061	0.0758422	0.00142112	0.00922278	0.0253784	0.014498	0.00149019	0.000588071	0.000970317	0.00455687	0.00106524	0.00524109	0.00130091	0.00358992	0.0151351	0.00424265	0.0832928
Tl2t1	LN	1	0.00263505	0.00316962	0.000295473	0.00130397	0.000548815	0.199708	0.00236381	0.121351	0.000658577	0.0505369	0.000506212	0.000396375	5.69753e-05	0.000777573	0.00208604	0.00519831	0.00539188	0.00695201	0.245269	0.00579856	0.000481065	0.0130073	0.00251879	5.51529e-05	0.00038607	0.000551529	0.0238692	0.000916976	0.00579601	0.003332	0.0648957	0.00146963	0.0140745	0.0712888	0.0202891	0.000711835	0.00108881	0.00123207	0.00363316	0.000980377	0.00510729	0.00106602	0.00215727	0.0169478	0.00334265	0.0857968
Tl2t2	LN	2	0.00230894	0.00290792	0.000624843	0.00119095	0.00027006	0.199581	0.002211	0.118974	0.00103114	0.0530182	0	0.000177316	0.000280363	0.00231895	0.00179457	0.0065645	0.00519136	0.00550974	0.270471	0.00473895	0.000329132	0.0150466	0.00316012	4.93447e-05	7.4017e-05	0.000542791	0.020187	0.000820408	0.00541108	0.00583695	0.0693623	0.00113786	0.00965914	0.056652	0.0151527	0.00101899	0.000487072	0.00148685	0.00340533	0.00025798	0.00488098	0.00141774	0.00388624	0.0170518	0.00377764	0.0797432
Tl2t3	LN	3	0.00126451	0.00116968	0.000161335	0.000571082	0.00020602	0.142689	0.0014117	0.0908428	0.0010713	0.0449159	0.00502516	0.000255078	0.00432037	0.00441083	0.00132521	0.00191074	0.000863051	0.00489065	0.36431	0.00414415	0.000977295	0.00215101	0.000304308	0.000289854	4.14077e-05	0.00037267	0.03872	0.00091793	0.00100905	0.000378394	0.06575	0.000212186	0.00768113	0.0456381	0.0062824	0.000769582	8.60481e-05	0.000129072	0.00333386	0.00588838	0.0126798	0.00229289	0.0018385	0.0135166	0.00647212	0.106509
Tl2t4	LN	4	0.00283039	0.00104951	0.000645851	0.00187789	0.000357383	0.19933	0.00223359	0.124349	0.00109964	0.0492415	8.45232e-05	0.000113457	0.000142699	0.00017311	0.00225062	0.00547907	0.00414043	0.00786962	0.217399	0.00608847	0.000141749	0.0106775	0.00179829	0.000690674	0.00113271	0.000414405	0.0307054	0.000194866	0.0043199	0.000785437	0.056691	0.00113255	0.0192251	0.0915195	0.0238288	0.000427884	0.000401875	0.000545402	0.00309096	0.000346649	0.00491314	0.00181844	0.00271613	0.0182714	0.00384815	0.0936068
Tl2t6	LN	6	0.00245191	0.00259762	0.000202037	0.0014595	5.89702e-05	0.152718	0.00167404	0.0932913	0.000678158	0.0385696	0.00592274	0.000547593	0.00535676	0.00157817	0.00247134	0.00430556	0.00179395	0.00573481	0.317551	0.00452315	0.000243249	0.000184709	0.00115102	5.92619e-05	0.000177786	0.00109635	0.0416809	0.000985293	0.00219628	0.000270775	0.0602301	0.002065	0.0100517	0.0510972	0.00905283	0.000428326	0.000523389	0.000277088	0.00291239	0.0052361	0.0126905	0.00157885	0.0027252	0.0170447	0.0068368	0.125718
Tl2t8	LN	8	0.00160692	0.00501766	0.000334511	0.000211442	0.000170864	0.144622	0.00284337	0.104918	0.000512591	0.0481816	0.00599755	0.000308511	0.0045676	0.002376	0.00170689	0.00876634	0.00102254	0.0056666	0.364442	0.0022132	0.00110126	0.000222994	0.000901356	0	8.58544e-05	0.00030049	0.0391027	0.000692083	0.00135118	0.000348692	0.0587248	0.000527933	0.00818295	0.0415981	0.00414865	0.000620528	0.000579836	0.000178411	0.00291757	0.00529651	0.0137324	0.00215277	0.00204211	0.0159296	0.00374278	0.0900324
Tl2t10	LN	10	0.0021167	0.00656624	0.000164156	0.00116213	8.38487e-05	0.147331	0.00184677	0.100483	0.000335395	0.0497422	0.00674574	0.00103815	0.00539696	0.00228798	0.0010215	0.00264735	0.0015472	0.00522706	0.354282	0.00523881	0.000562042	0.000875449	0.000707722	0.000210659	8.42634e-05	8.42634e-05	0.0425385	0.000679258	0.00192505	0.000470567	0.0575937	0.00151127	0.00872218	0.0441317	0.00459716	0.000913544	0.000656644	0.000131329	0.00233486	0.00599134	0.015074	0.00233297	0.0022715	0.0130362	0.00533094	0.0919689
Tl2t12	LN	12	0.00168166	0.00204207	0.000350069	0.000678581	0.000238414	0.138373	0.00218795	0.0890711	0.000625837	0.0347777	0.0053755	0.00129144	0.00392923	0.00212683	0.00145226	0.00711579	0.00109982	0.00469657	0.290654	0.00481394	0.000983447	0.0014002	0.0250283	0.00035939	0.000119797	0.000778679	0.0295141	0.00015089	0.000790639	0.000152046	0.0481651	0.000828731	0.0111725	0.05996	0.0108618	0.000989546	0.000777956	0.000311182	0.00288104	0.00532365	0.0117553	0.00140806	0.00259617	0.0187245	0.0175781	0.154807
Tl2t14	LN	14	0.00274117	0.0036063	0.00013782	0.00141708	0.000117328	0.164541	0.00176871	0.10189	0.00105595	0.0334958	0.00531481	0.000653699	0.00414135	0.00128061	0.00237846	0.00782553	0.00135749	0.00648325	0.267812	0.0060075	0.000387178	4.9e-05	0.000817	0.00014149	0.000212235	0.000117908	0.0331953	0.000665331	0.00114931	0.000215495	0.0475498	0.00161925	0.0189476	0.079092	0.019531	0.000608717	0.000392034	0.000147013	0.00231781	0.00350137	0.00985154	0.00083768	0.00184476	0.0287848	0.00436286	0.129636
Tl2t16	LN	16	0.00120304	0.00226307	0.000116055	0.000117372	0.000355675	0.145211	0.00107352	0.0895254	0.00160054	0.0270722	0.0043742	0	0.0013539	0.0805975	0.00080884	0.00511771	0.000827768	0.00523271	0.260738	0.00514908	0.00143658	0.00414679	0.000594159	0.000387221	0.000208504	0.000506366	0.0259919	0.000810373	0.0004839	0.000756093	0.0441435	0.00143476	0.0148055	0.0667345	0.01526	0.00024604	0.00259971	0.000123796	0.000685194	0.00214902	0.0104062	0.00295641	0.00198376	0.0299925	0.00516239	0.133258
Tl2t18	LN	18	0.000312146	0.000205767	0.00092595	0.000104051	0.00126123	0.196258	0.00174903	0.132457	0.00315309	0.0482406	0.00764781	0.000650652	0.0017458	0.132918	0.000819477	0.00290361	0.000419327	0.00251598	0.145857	0.0155894	0.000433544	0.000987624	0.00654249	0.000316868	0.000316868	0.00211245	0.0178497	0.00212859	0.00321735	0.00150143	0.0455454	0.000541243	0.0154979	0.0218003	0.0227421	0.000327175	0.000548728	0.00175593	0.000110442	0.00629518	0.0117815	0.00131496	0.00256814	0.0375104	0.00263654	0.0978834
Tl2t20	LN	20	0.00207843	0.00368719	0.000302228	0.000122263	9.26246e-05	0.146906	0.000846248	0.0919727	0.00179074	0.0311055	0.00506278	0.000191134	6.41056e-05	0.0481834	0.000993004	0.00469128	0.000585109	0.00492727	0.265989	0.00429721	0.00120989	0.00431961	0.00263856	0.000217193	3.10276e-05	0.000589524	0.026106	0.000437705	0.000252033	0.000567075	0.0450042	0.00187614	0.0144049	0.0658014	0.0150254	0	0.00245014	0	0.000356875	0.0045096	0.0106113	0.00168568	0.00459208	0.0271846	0.0496515	0.106589
Tl2t22	LN	22	0.00346054	0.00476605	0.000366619	3.08983e-05	6.24214e-05	0.144552	0.000763797	0.0834255	0.00287139	0.0320169	0.00578957	0.000354225	0.000388818	0.0623666	0.00073004	0.0068979	0.000249042	0.00398469	0.300717	0.00275857	0.00196333	0.00537678	0.00516987	0.000533206	0.000439111	3.13651e-05	0.0367879	0.000474071	0.000732478	0.000891712	0.0496759	0.00102863	0.00633253	0.0462545	0.00426982	0	0.00283528	0.000130358	0.000229573	0.00462425	0.012212	0.00262157	0.00507308	0.0185759	0.043088	0.0940954
Tl2t24	LN	24	0.00182844	0.00305399	0.000537502	0.000444765	0	0.190162	0.00139263	0.108473	0.0023711	0.031217	0.00552516	0.000515038	2.59112e-05	0.011185	0.00160547	0.00586097	0.000622365	0.0061739	0.319138	0.00443738	0.00203335	0.00630633	0.000974328	0.000526731	0.000351154	0.00110363	0.0306575	0.00164282	0.000738563	0.000432951	0.0514695	0.00205648	0.0129558	0.0589138	0.0109213	0.00015539	0.00278858	0.000599415	0.000917938	0.0033308	0.0130651	0.000681347	0.0070797	0.0147216	0.00146683	0.0795396
TlTt0	LN	0	0.000402626	0.000165882	0.000165882	0.000603952	0.000440597	0.235145	0.00172519	0.122837	0.00064395	0.0508679	0.000104204	6.99376e-05	7.03703e-05	0.00124494	0.001569	0.00122055	0.00113246	0.00390446	0.327155	0.0063871	0.000104852	0.0125621	0.00368309	0.000153269	0.000391687	0.000238418	0.00471899	0.0011154	0.00136602	0.000985612	0.102687	0.000977381	0.00605627	0.0218101	0.00745049	0.00172321	0.00175177	0.000920119	0.00405996	0.00033833	0.0064693	0.000498189	0.00356459	0.00642817	0.00726111	0.0468276
TlTt1/2	LN	0.5	0.00155828	0.000702435	0.000838391	0.00222289	0.000277777	0.201198	0.000861058	0.10097	0.000763886	0.0376111	0.000569364	0.000119417	0.00891558	0.000218645	0.00225604	0.00134751	0.00150074	0.00332474	0.345744	0.00660818	0.00322261	0.00350443	0.000317493	0.0001861	0.0001861	0.000255888	0.0152596	0.000281283	0.00118099	4.72397e-05	0.0893139	0.00162118	0.00750987	0.0299844	0.00340854	0.0053803	0.00166777	0.000870141	0.00323508	4.86478e-05	0.00827395	0.0188844	0.00285265	0.0108338	0.00435329	0.0697131
TlTt1	LN	1	0.000772082	0.000854319	0.00018177	0.000772098	0.000148553	0.226081	0.00183589	0.129032	0.000761335	0.0570611	0.000380615	9.57954e-05	0.00040483	0.000526183	0.00162879	0.00203367	0.00205586	0.00337089	0.308064	0.0068668	0.000536178	0.0121949	0.00229221	0.000111966	0.000391881	9.33049e-05	0.0078975	0.000676928	0.00164844	0.00170529	0.0970422	0.00109012	0.00654072	0.0214148	0.00870708	0.00154144	0.00135726	0.00116336	0.00396101	0.000858545	0.00630346	0.000779865	0.00376792	0.00916694	0.0057343	0.0600944
TlTt2	LN	2	0.000886984	0.00047125	7.85417e-05	0.000582509	6.68634e-05	0.235942	0.00147922	0.119454	1.33727e-05	0.046617	9.59358e-05	0.000179368	0.000388721	0.00103856	0.00156398	0.00258607	0.00185401	0.00362801	0.307023	0.00607278	0.000303389	0.0121052	0.00379531	0.000120949	0.00022846	0.000107511	0.0106843	0.000622909	0.00139182	0.00102339	0.0957797	0.00121202	0.00926918	0.0425354	0.0107115	0.00172062	0.00149408	0.000823841	0.00404697	0.000590183	0.00684457	0.000814356	0.00340962	0.00607293	0.00547278	0.0487967
TlTt3	LN	3	0.000194416	0.000552687	0.000192239	9.72103e-05	0.000245483	0.191256	0.000865083	0.0978422	0.000662803	0.038196	0.00332092	0.000126641	0.00338948	0.00046374	0.000574201	0.00310025	0.000734548	0.00313409	0.359824	0.00576095	0.000632878	2.56304e-05	0.00186479	0.000172688	0.000222027	0.000123348	0.0127025	0.000422589	0.000526021	0.000125243	0.0915525	0.00144113	0.00680112	0.0313398	0.00417871	5.09442e-05	0.000435755	2.56326e-05	0.00368872	0.0059587	0.0105138	0.00219082	0.00419878	0.00771185	0.00834139	0.0942199
TlTt4	LN	4	0.000854409	0.000955638	0.000249297	0.0007984	1.41486e-05	0.223718	0.00128805	0.117057	0.000707431	0.036821	4.3501e-05	0.000175177	0.000249703	0.00098003	0.0015582	0.00187061	0.00172168	0.00371151	0.257668	0.00689948	0.000306402	0.00912929	0.00401553	0.000127967	0.000241716	0.000327028	0.00889721	0.000845307	0.00141483	0.00112609	0.0804243	0.00136978	0.0153153	0.0551134	0.0140812	0.00130662	0.00135917	0.000723907	0.0038655	0.000490621	0.00591008	0.000772476	0.00347218	0.0214832	0.00533678	0.105203
TlTt6	LN	6	0.00113495	0.000599034	2.27481e-05	0.000575158	8.52093e-05	0.215898	0.00124358	0.10951	0.000573226	0.0290212	7.93886e-06	1.59848e-05	3.21673e-05	0.000861751	0.00142688	0.00165087	0.00191613	0.0042186	0.216983	0.00845201	0.000151777	0.0077319	0.000809107	0.000560492	0.0001012	0.00089523	0.00914621	0.000360828	0.00133581	0.000750897	0.0678663	0.00174721	0.0253705	0.0727847	0.0210492	0.0010208	0.00135078	0.000436778	0.00305242	0.000431408	0.00593901	0.000829587	0.00313542	0.0274969	0.00502427	0.146393
TlTt8	LN	8	0.000236637	0.000233987	7.0196e-05	0.000141985	2.39035e-05	0.198546	0.00149753	0.104004	0.000286842	0.0460521	0.00360116	0.00108517	0.0040201	0.00022578	0.00102505	0.000542443	0.000739096	0.00364782	0.370383	0.00609531	0.000197201	9.98286e-05	0.001034	4.80434e-05	0	2.40217e-05	0.0152493	0.000532515	0.000512204	0.000414641	0.0932799	0.00155099	0.00588391	0.0304175	0.00339495	0.000967318	9.98374e-05	9.98374e-05	0.00416953	0.00635477	0.0107937	0.00160623	0.00436783	0.00584907	0.00538932	0.0652055
TlTt10	LN	10	0.00130766	0.000463797	0.000140545	0.0014214	1.43577e-05	0.232894	0.00146168	0.118033	0.000933248	0.0467392	0.000397293	0.000103697	0.000506785	0.000421914	0.00151126	0.00254989	0.00273524	0.00388092	0.305278	0.00646173	0.000370154	0.0122923	0.000212074	4.3286e-05	0.000418432	0.000678148	0.0112531	0.000726946	0.00190454	0.00159688	0.0934351	0.00147874	0.00938999	0.0443729	0.0118303	0.00123653	0.00134927	0.000359805	0.00478257	0.00049787	0.00698431	0.000859264	0.00404209	0.00632079	0.00546165	0.0508477
TlTt12	LN	12	0.000575559	0.0016339	0.000330452	0.000389903	3.75091e-05	0.208326	0.00135854	0.104847	0.000975236	0.0399843	0.00432467	0.000367657	0.00434182	9.84142e-05	0.00127949	0.000795683	0.000710834	0.00405926	0.33951	0.00619228	9.67019e-05	0.000567856	0.00100914	0.000226168	5.65419e-05	3.76946e-05	0.017472	0.000550748	0.000267915	0.00053583	0.0877476	0.001101	0.0100829	0.0506483	0.00842188	0.00101194	0.00113581	3.9166e-05	0.00433558	0.00628659	0.0117411	0.00092549	0.00342698	0.00725446	0.00438875	0.0604928
TlTt14	LN	14	0.000377174	0.000796755	0.000423806	0.000822942	6.92718e-05	0.206445	0.00127143	0.103211	0.000727354	0.035769	0.00390466	0.00105422	0.00435084	0.000690656	0.00108021	0.00217003	0.000587291	0.00393833	0.31127	0.00652727	0.000732216	0	0.000200986	0.000104422	0.000365476	0.000539512	0.0160635	0.000561171	0.000247393	0.000212051	0.0796622	0.000945322	0.0146079	0.0627714	0.0128045	0.00127585	0.000867981	0.000216995	0.00393069	0.00591423	0.0107136	0.000909147	0.00334845	0.0142488	0.00444118	0.0788282
TlTt16	LN	16	0.00168795	0.000989063	0.000576953	0	0.00018945	0.1946	0.00127755	0.102988	0.002105	0.0361828	0.00427151	0.000304063	0.00476398	0.0179608	0.00127197	0.00220152	0.000986799	0.00312838	0.316546	0.00594509	0.00154124	0.000373625	0.0012215	0.000528853	0.000126925	0.00025385	0.0156244	0.00070342	0.000193312	0.000816204	0.0788934	0.00273168	0.0134633	0.0606679	0.0120027	0.00224975	0.00375856	0.000131879	0.000752055	0.00446809	0.0113306	0.00181232	0.00429368	0.0111789	0.00233925	0.0705667
TlTt18	LN	18	0.00119389	0.00127623	0.000143576	0.000758297	0.000179268	0.237324	0.00165912	0.119198	9.77825e-05	0.0417203	0.00015032	0.000470815	0.000186107	0.00107754	0.00192188	0.00215467	0.0027471	0.00455144	0.297606	0.00687099	1.68062e-05	0.0128637	0.00261355	9.82661e-05	0.000147399	3.27554e-05	0.0101162	0.000594102	0.00154652	0.000981126	0.0886858	0.00154421	0.0119844	0.0543048	0.0137517	0.00121755	0.00117417	0.00056156	0.0046066	0.000770621	0.00692816	0.000804221	0.00361853	0.00670442	0.00491077	0.0481347
TlTt20	LN	20	0.00131393	0.00159618	0.000389765	1.87709e-05	0.000379213	0.187966	0.00109507	0.104798	0.00155477	0.03951	0.00402242	0.000313009	0.000137788	0.0356593	0.00131203	0.00222621	0.000397147	0.00338523	0.29	0.00560542	0.00103631	0.00502831	0.00138032	0.000628797	0.000228653	0.000495416	0.0148608	0.000710401	0.000541719	0.000174124	0.0722846	0.00185517	0.0131815	0.0592476	0.0122568	0.00159361	0.00344489	0.00033657	0.000438323	0.0045227	0.0103062	0.00137363	0.00451209	0.0115483	0.0310386	0.0652947
TlTt22	LN	22	0.00199907	0.000707106	0.000530329	0.00126773	6.56692e-05	0.225857	0.00157493	0.113998	0.000591022	0.0448161	0.000353333	0.000186327	6.81746e-05	0.00117163	0.00148805	0.00351501	0.00302936	0.00445401	0.306606	0.00608773	0.000440183	0.014467	0.00403584	0.000445459	0.000445459	0.00021448	0.0169903	0.00091435	0.00234527	0.00110563	0.0908346	0.00158941	0.00886013	0.0439278	0.0105098	0.00109025	0.000994265	0.000222852	0.00512361	0.000517537	0.00720496	0.00106871	0.00369755	0.00636793	0.00478911	0.0534305
TlTt24	LN	24	0.000627606	0.0010431	0.000752614	4.00608e-05	0.000242795	0.193297	0.00116194	0.101114	0.00122746	0.0269311	0.00309656	0.000306177	0.000616142	0.0199745	0.00140664	0.00267503	0.000645783	0.00513939	0.22671	0.00648171	0.000959788	0.00409821	0.000754258	0.000894651	0.000799764	0.000786209	0.0149292	0.000805875	9.63447e-05	0.000440433	0.058115	0.00222277	0.0311049	0.100343	0.0268347	0.000181951	0.00274647	0.000591547	0.000354344	0.00507421	0.00780255	0.000254922	0.00325289	0.0224989	0.011444	0.109124
